1 **Survival and growth of saprotrophic and mycorrhizal fungi in recalcitrant amine, amide**  
2 **and ammonium containing media**

3

4 Åke Stenholm<sup>1,4¶</sup>, Anders Backlund<sup>2¶</sup>, Sara Holmström<sup>1¶</sup>, Maria Backlund<sup>3&</sup>, Mikael  
5 Hedeland<sup>4&</sup>, Petra Fransson<sup>5¶\*</sup>

6

7 <sup>1</sup> Cytiva, Björkgatan 30, SE-751 84 Uppsala, Sweden

8 <sup>2</sup> Pharmacognosy, Department of Pharmaceutical Biosciences, Uppsala University, BMC Box  
9 591, SE-751 24 Uppsala, Sweden

10 <sup>3</sup> SLU Artdatabanken, Swedish University of Agricultural Sciences, Box 7007, 750 07  
11 Uppsala, Sweden

12 <sup>4</sup> Analytical Pharmaceutical Chemistry, Department of Medicinal Chemistry, Uppsala  
13 University, BMC Box 574,  
14 SE-751 23, Uppsala, Sweden

15 <sup>5</sup> Uppsala BioCenter, Department of Forest Mycology and Plant Pathology, Swedish  
16 University of Agricultural Sciences, PO Box 7026, SE-750 07 Uppsala, Sweden; <sup>2</sup>

17

18 \* Corresponding author

19 E-mail: [petra.fransson@slu.se](mailto:petra.fransson@slu.se)

20

21 ¶ These authors contributed equally to the work, and ÅS and AB shared first authorship

22 & These authors also contributed equally to this work

23

24 Short title: Fungal growth in recalcitrant amine, amide and ammonium containing media

25

## 26 Abstract

27 The elimination of hazardous compounds in chemical wastes can be a complex and  
28 technically demanding task. In the search for environmental-friendly technologies, fungal  
29 mediated remediation and removal procedures are of concern. In this study, we investigated  
30 whether there are fungal species that can survive and grow on solely amine-containing  
31 compounds. One compound containing a primary amine group; 2-diethylaminoethanol, one  
32 compound with a primary amide group; 2,6-dichlorobenzamide (BAM), and a third  
33 compound containing a quaternary ammonium group; N<sub>3</sub>-trimethyl(2-  
34 oxiranyl)methanaminium chloride, were selected. The choice of these compounds was  
35 motivated by their excessive use in large scale manufacturing of protein separation media (2-  
36 diethylaminoethanol and the quaternary amine). 2,6-dichlorobenzamide, the degradation  
37 product of the herbicide 2,6-dichlorobenzonitrile (dichlobenil), was chosen since it is an  
38 extremely recalcitrant compound. Utilising part of the large fungal diversity in Northern  
39 European forests, a screening study using 48 fungal isolates from 42 fungal species, including  
40 saprotrophic and mycorrhizal fungi, was performed to test for growth responses to the chosen  
41 compounds. The ericoid mycorrhizal fungus *Rhizoscyphus ericae* showed the best overall  
42 growth on 2-diethylaminoethanol and BAM in the 1-20 gL<sup>-1</sup> concentration range. A 3500%  
43 and 450% increase in biomass, respectively, was observed. For N<sub>3</sub>-trimethyl(2-  
44 oxiranyl)methanaminium chloride, the peak growth occurred at 1 gL<sup>-1</sup>. In a second  
45 experiment, including three of the most promising species (*Laccaria laccata*, *Hygrophorus*  
46 *camarophyllus* and *Rhizoscyphus ericae*) from the screening experiment, a simulated process  
47 water containing 1.9% (w/v) 2-diethylaminoethanol and 0.8% (w/v) N<sub>3</sub>-trimethyl(2-  
48 oxiranyl)methanaminium chloride was used. *Laccaria laccata* showed the best biomass  
49 growth increase (380%) relative to a growth control, while the growth increase for  
50 *Rhizoscyphus ericae* and *H. camarophyllus* were 292% and 136% respectively, showing that

51 also mycorrhizal fungal species can use amine- and amide-containing substrates as nutrients.  
52 These results show the potential of certain fungal species to be used in alternative green  
53 wastewater treatment procedures.

54

## 55 **Introduction**

56 The treatment and destruction of hazardous chemical wastes, such as process water from  
57 chemical industries, is a high-cost business connected with environmental risks and  
58 considerable energy consumption. This is especially true when desiccation followed by high  
59 temperature combustion is used. In the search for more environmental-friendly technologies,  
60 fungal mediated remediation and removal procedures are of interest. Bioremediation and  
61 biodegradation using for example fungi, bacteria, algae, or plants have developed alongside  
62 the commonly used physiochemical technologies [1] and today play an important role in both  
63 natural and engineered systems [2]. Fungi are heterotrophic eukaryotes, dependent on organic  
64 carbon (C) compounds bio-synthesized by other living organisms. To be able to utilize those,  
65 fungi employ powerful enzyme systems to depolymerize and catabolize a plethora of organic  
66 compounds. In this capacity they also become of interest from the perspective of possibly  
67 catabolizing hazardous chemical compound and transforming them to biomass.

68

69 Fungi are of fundamental importance to all ecosystems, with roles as and symbionts, and in  
70 elemental cycling, and as such inhabit an immense array of different habitats. They can be  
71 split up into large ecological groups - such as saprotrophic and symbiotic fungi - depending  
72 on their functions, and evolution of primary lifestyles has occurred repeatedly via loss or  
73 reduction of genes for groups of enzymes [3, 4]. Saprotrophic fungi belonging to the phylum  
74 *Basidiomycota* primarily facilitate organic matter decomposition, utilizing C and nutrients

75 from leaf litter and wood for growth [5]. Wood decomposing fungi can be further divided into  
76 groups; fungi with the ability to selectively or simultaneously degrade persistent lignin using  
77 highly specialized class II peroxidases (white rot fungi), and fungi not able to degrade lignin  
78 which instead selectively degrade cellulose (brown rot fungi; use of Fenton chemistry) [3].  
79 Saprotrophic fungi also secrete a range of other enzymes, including cellulose, pectin and  
80 hemicellulose degrading enzymes [3]. Mycorrhizal fungi, on the other hand, live in symbiosis  
81 with vascular plants, receiving photo-assimilated C from their host plants in return for mineral  
82 nutrients and water taken up from the surrounding soil [6]. Fungi belonging either to  
83 *Basidiomycota* or *Ascomycota* form symbiosis with boreal trees, and are called  
84 ectomycorrhizal (ECM) fungi. Depolymerization of organic matter was earlier assumed to be  
85 carried out only by free-living saprotrophic fungi. Although the involvement of ECM fungi in  
86 decomposition of soil organic matter remains controversial, recent findings support the view  
87 that ECM fungi also have the capacity to oxidize organic matter [4, 7, 8], through enzyme  
88 systems similar to those of white rot fungi including peroxidases [9, 10] and brown-rot fungi  
89 Fenton chemistry [11].

90

91 In addition to their ability to decompose organic matter, fungi were recently high-lighted for  
92 their large potential to be exploited further for industrial use; in strategies against human and  
93 plant diseases, for production of food and beverages, for enhancing crops and forestry, and for  
94 improving waste disposal [12]. This was attributed to their wide-spread distribution and  
95 adaptation to all kinds of environments, their competitive ability, and that they can in many  
96 cases be cultured with relative ease. Fungi are well known to tolerate and metabolize both  
97 recalcitrant and toxic compounds, and are used for bioremediation [13, 14]. Due to their  
98 diverse metabolic capacity fungi are therefore good candidates for managing chemical waste.

99

100 Fungi with peroxidases are often used in whole cell fungal treatments (*in vivo*) of  
101 wastewaters, not at least in those waters that contain pharmaceuticals [15, 16]. The catabolism  
102 of the pharmaceuticals is in these cases performed by the extracellular enzymes which are  
103 secreted from the fungal mycelia [17, 18]. There are also examples of *in vitro* experiments in  
104 which solely enzymes and not living fungal cells have been used [19, 20]. It has been  
105 demonstrated that fungi that produce these extracellular enzymes can use nitrogen (N)  
106 containing aromatic compounds as sole N sources [21], or as both C and N source [22].  
107 However, when it comes to the removal of non-aromatic compounds, the use of these fungi is  
108 relevant only when combined with redox-mediators that enhance the oxidation capacity of the  
109 enzymes [20] or with reactive oxygen species like the hydroxyl radical [23].

110  
111 Amines, amides and quaternary ammonium compounds are relatively commonly occurring  
112 substances, containing both N and C, which make them interesting from a nutrient point of  
113 view. On the other hand, the removal of these substances as contaminants in ground and  
114 wastewaters is important since many of them are both toxic and carcinogenic. Amines are  
115 used in the syntheses of azo-dyes, polyurethane, pesticides and many other products. The  
116 degradation of amines is facilitated both by Advanced Oxidation Procedures (AOPs) and non-  
117 AOPs such as biodegradation [24]. AOPs are based on the generation of hydroxyl radicals  
118 which can be facilitated chemically (Fenton's reagent), photo chemically (UV/TiO<sub>2</sub>/H<sub>2</sub>O<sub>2</sub>,  
119 O<sub>3</sub>/UV) or sonolytically (ultrasound). Although argued that these techniques have an  
120 advantage of removing even the non-biodegradable contaminants, there are some drawbacks;  
121 reaction products can be even more toxic than the precursors [25], and the presence of organic  
122 or inorganic constituents leads to higher oxidant requirements in order to maintain the  
123 treatment efficiency [26]. Using biodegradation, the end product (for example via fungal  
124 degradation) could be compostable biomass. The majority of amine containing compounds

125 that so far has been successfully biodegraded using fungi with peroxidases are aromatic  
126 amines including azo-dyes [27], tannic and humic acid [28], and pharmaceuticals [29].  
127 Aromatic amines can also be adsorbed to sorbents like activated C or modified chitosan [30].  
128 The possibility to biodegrade non-aromatic amines, amides and quaternary ammonium  
129 compounds is less investigated. However, the possibility to remove N-containing recalcitrant  
130 compounds in wastewaters using fungi is challenging, and the knowledge is scarce on how to  
131 predict the removal efficiency of harmful substances using fungi.

132  
133 The overall aim of the present study was to test the feasibility of growing fungi for the  
134 purpose of metabolizing recalcitrant compounds, utilising part of the fungal species' diversity  
135 in Northern European forests and evaluating their growth and survival on relevant N-  
136 containing recalcitrant compounds. We wanted to screen a larger number of fungal species  
137 with varying taxonomy and ecology, and as a first step we performed a screening study using  
138 48 isolates from 42 species, including both saprotrophic and mycorrhizal fungi. Their ability  
139 to survive and grow in high concentration solutions of 2-diethylaminoethanol, N<sub>3</sub>-trimethyl(2-  
140 oxiranyl)methanaminium chloride and 2,6-dichlorobenzamide (BAM) were evaluated. The  
141 chemicals are of interest since they are toxic and difficult to handle in wastewater treatments  
142 plants. 2-diethylaminoethanol and N<sub>3</sub>-trimethyl(2-oxiranyl)methanaminium chloride are used  
143 as ligands in the large-scale manufacturing of weak and strong anion-exchangers in the  
144 protein separation field. BAM is a persistent, water soluble degradation product of the  
145 pesticide 2,6-dichlorobenzonitrile (dichlobenil), contaminating ground waters [31]. After the  
146 screening study a sub-set of species that showed the best growth was chosen for a simulated  
147 process water experiment containing both 2-diethylaminoethanol and N<sub>3</sub>-trimethyl(2-  
148 oxiranyl)methanaminium chloride.

149

## 150 **Materials and methods**

### 151 **Fungal isolates and experimental systems**

152 Two experiments were set up; firstly a screening experiment (S1 Fig) to test survival and  
153 growth of a wide range of fungal species in the presence of 2-diethylaminoethanol, N<sub>3</sub>-  
154 trimethyl(2-oxiranyl)methanaminium chloride and BAM, and secondly a simulated process  
155 water experiment (S2 Fig) including 2-diethylaminoethanol and N<sub>3</sub>-trimethyl(2-  
156 oxiranyl)methanaminium chloride and the top three fungal species able to grow on the  
157 investigated N-containing compounds from the screening experiment. A total of 48 fungal  
158 isolates and 42 fungal species (S1 Table) were included in the screening experiment. Within-  
159 species variation was tested for four mycorrhizal species (*Cenococcum geophilum*, *Laccaria*  
160 *laccata*, *Piceirhiza bicolorata* and *Suillus variegatus*) and two saprotrophic species  
161 (*Armillaria mellea* and *Hypholoma fasciculare*). The selection of candidate fungal species for  
162 the second experiment was later on based on their overall growth on two of the tested  
163 compounds (2-diethylaminoethanol and N<sub>3</sub>-trimethyl(2-oxiranyl)methanaminium chloride).  
164 Species names, authorities and taxonomical classifications are taken from the Dyntaxa  
165 database [32], and information about species ecology from Hallingbäck and Aronsson [33].  
166 The investigated species included both saprotrophic (white rot fungi, brown rot fungi and  
167 litter decomposing fungi) and mycorrhizal fungi (ECM and ERM fungi). Fungal isolates were  
168 obtained directly from sporocarps collected from forests around Uppsala in 2005 and from  
169 fungal culture collections at the Department of Forest Mycology and Plant Pathology, SLU,  
170 Uppsala, Sweden (Petra Fransson and Rimvydas Vasaitis). Isolating new isolates from  
171 sporocarps were done by removing small pieces of fungal tissue from the sterile inside of the  
172 sporocarp and placing them on half-strength modified Melin–Norkrans (MMN) medium [34]  
173 in 9 cm Petri dishes, until growth was apparent, and fungi were sub-cultured to new plates.

174 All fungal isolates were maintained on MMN medium in darkness at 25 °C and had grown on  
175 new plates for one month before starting the experiments. For the screening experiment  
176 fungal isolates were grown in Petri dishes in 50 mL basal Norkrans medium [35] with a C:N  
177 ratio of 15 and pH adjusted to 4.5. One piece of agar containing mycelia was cut out with a  
178 corer ( $\varnothing$  10 mm) from the actively growing mycelial edge of the fungal culture and placed in  
179 the liquid medium (one replicate per species and treatment, with three chemicals and three  
180 concentrations, giving a total of 432 plates). Growth controls including basal Norkrans  
181 medium only were also prepared (n=2). In order to increase survival some of the fungi with  
182 slow growth rates, mostly ECM species and the ERM fungus *Rhizoscyphus ericae*, were cut  
183 out and put on new agar plates for approximately one week so that growth resumed before the  
184 agar pieces were transferred to liquid medium. Petri dishes with liquid isolates were incubated  
185 in darkness at 25 °C for one week before chemical exposure.

186

187 For the simulated process water experiment three selected fungal species (*Hygrophorus*  
188 *camarophyllus*, *Rhizoscyphus ericae* and *Laccaria laccata* AT2001038) were grown in  
189 autoclaved 1000 mL Erlenmeyer flasks containing 200 mL basal Norkrans medium with a  
190 C:N ratio of 15 and pH adjusted to 4.5. Ten pieces of agar with actively growing mycelia  
191 were initially transferred to each flask (n=5, giving a total of 15 flasks) with a sterile tool. The  
192 flasks were sealed with aluminium foil and kept in dark in closed cardboard boxes at room  
193 temperature. After one week's growth in basal Norkrans medium 800 mL of the simulated  
194 process water was added to each flask (n=3). Controls (n=2) containing only 200 mL Basal  
195 Norkrans medium were included for each of the three fungal species. The chemicals used in  
196 the growth media were supplied from Sigma-Aldrich (Switzerland).

197



## 198 **Chemical exposure and harvest**

199 For the screening experiment standard solutions of 2-diethylamine (Fluka, Switzerland; S1  
200 Fig) and N<sub>3</sub>-trimethyl(2-oxiranyl)methanaminium chloride (Evonik Industries AG, Germany,  
201 trade name; glycidyltrimethylammonium chloride (gly)); (S1 Fig) were prepared in autoclaved  
202 flasks using autoclaved double distilled water. Both substances were prepared so that in the  
203 screening experiment 2 mL added to a Petri dish with 50 mL liquid medium including  
204 mycelia, would give the concentrations 1, 10 and 20 g L<sup>-1</sup>. 2,6-dichlorobenzamide (BAM)  
205 (Acros Organics, Belgium; S1 Fig) was not possible to dissolve at a concentration of 2.7 g L<sup>-1</sup>  
206 as previously reported [36]. A saturated solution was prepared by dissolving 250 mg BAM in  
207 one litre warm (80° C) double distilled water for 3.5 hours. The undissolved material was  
208 removed by vacuum filtration using a 0.45 µm HAWPO4700 cellulose-based Millipore filter.  
209 The separate compounds were added to the fungal isolates after a week on liquid medium,  
210 during which time the mycelia were adjusted to growing in liquid media and it was assumed  
211 that part of the glucose and ammonium sulfate was consumed. After adding the compounds,  
212 the fungal isolates were grown for an additional two weeks, giving a total growth period of  
213 three weeks.

214

215 The composition and final concentrations of the simulated process water, chosen to reflect  
216 conditions at which the amines are present in large-scale manufacturing plants, are found in  
217 Table 1. To simulate a harsher environment including substances that are present in process  
218 waters NaCl and Na<sub>2</sub>SO<sub>4</sub> were added to the 2-diethylaminoethanol and N<sub>3</sub>-trimethyl(2-  
219 oxiranyl)methanaminium chloride, and the C:N ratio in the mixed water was approximately  
220 5.1. After additions to the Erlenmeyer flasks fungi were grown for another three weeks,  
221 giving a total growth period of four weeks for the second experiment. The growth controls  
222 were harvested already after one week's growth in 200 mL liquid medium. At the end of both

223 experiments the contents of the Petri dishes and Erlenmeyer flasks were vacuum-filtered onto  
224 weighed filter papers (Munktell 1003, 9 cm). Filter papers were dried in an oven at 105° C and  
225 re-weighed for fungal biomass.

226

227 **Table 1. Composition of simulated process water.**

| <b>Composition</b>                                          | <b>%<br/>(w/v)<sup>1</sup></b> | <b>%<br/>(w/v)<sup>2</sup></b> |
|-------------------------------------------------------------|--------------------------------|--------------------------------|
| 2-diethylaminoethanol                                       | 2.4                            | 1.9                            |
| N <sub>3</sub> -Trimethyl(2-oxiranyl)methanaminium chloride | 1.0                            | 0.8                            |
| NaCl                                                        | 1.9                            | 1.5                            |
| Na <sub>2</sub> SO <sub>4</sub>                             | 0.8                            | 0.6                            |

228

229 <sup>1</sup> Original solution

230 <sup>2</sup> After 4:1 dilution with Basal Norkrans liquid medium pH was finally adjusted to 4.5

231

## 232 **Statistical analysis**

233 Growth of each fungal species in the N-containing compounds' treatments was calculated as a  
234 percentage of the mean value of the respective growth control (S2 Table). For the screening  
235 experiment differences in the average biomass in control treatment between mycorrhizal and  
236 saprotrophic fungi, and between types of saprotrophs (white rot, brown rot and generalists)  
237 was tested using One-way ANOVA in Minitab 18.1 (Minitab Inc., State College, PA, USA).  
238 Ordination analysis was performed using CANOCO version 5.02 (Microcomputer Power,  
239 Ithaca, NY, USA). Variation in biomass in controls and all amine treatments (10 response  
240 variables) for each fungal isolate (n=48) was visualized using principal components analysis  
241 (PCA), without transforming data. We also used the multi-response permutation procedure

242 (MRPP), a nonparametric procedure in PC-ORD version 5.33 software [37] for testing the  
243 hypothesis of no difference between two or more *a priori* assigned groups [38]. This was  
244 done to test for the effects of main functional groups (mycorrhizal, saprotroph,  
245 saprotroph/parasite and parasite), functional groups (ectomycorrhizal, ericoid mycorrhizal,  
246 saprotroph, generalist, white rot, brown rot, litter decomposer and unknown), phylum  
247 (*Ascomycota* and *Basidiomycota*), and order (Agaricales, Atheliales, Boletales, Pezizales,  
248 Polyporales, Russulales, and Thelephorales). MRPP provides p-values as well as A-values  
249 that measure ‘effect sizes,’ representing homogeneity within the group compared with that  
250 expected randomly. For instance, perfect homogeneity in the group gives  $A = 1$ , whereas A  
251 values between 0 and 1 indicate that heterogeneity between the groups is greater than that  
252 expected by chance. For the simulated process water experiment net growth was calculated by  
253 subtracting controls (n=2) from the total four mean weeks growth including three weeks with  
254 added SPW (n=3).

255

## 256 **Results**

### 257 **Screening experiment – growth controls**

258 In the control treatment fungi produced on average  $24.1 \pm 1.6$  mg biomass when grown for  
259 three weeks in a liquid nutrient media, with somewhat higher biomass (but not significantly  
260 so) for mycorrhizal fungi ( $26.0 \pm 2.3$  mg) compared to saprotrophic fungi ( $21.8 \pm 2.3$  mg).  
261 Comparing taxonomic groups within the mycorrhizal fungi the five ascomycetes produced on  
262 average  $28.5 \pm 9.7$  mg biomass compared to the 21 basidiomycetes which produced  $24.4 \pm 3.4$   
263 mg. All saprotrophic fungi were basidiomycetes. Comparing the different functional groups  
264 and rot types within the saprotrophic fungi, the white rot fungi (11 isolates) produced  $25.6 \pm$   
265  $3.2$  mg biomass, brown rot (5 isolates)  $21.3 \pm 11.0$  mg, and generalists (2 isolates)  $5.5 \pm 5.5$

266 mg. The largest biomass was produced by the saprotrophic fungus *Ganoderma applanatum*  
267 (62.0 mg), followed by the mycorrhizal fungi *Pisolithus arhizus* and two isolates of *Piceirhiza*  
268 *bicolorata* (ca. 50 mg)(S2 Table). Some fungal isolates grew poorly in the control treatment  
269 (S2 Table); the mycorrhizal fungi *Amanita citrina*, *Laccaria laccata* AT2001038,  
270 *Rhizoscyphus ericae*, *Thelephora sp.* and *Tricholoma pessundatum* produced 1.2-6.7 mg  
271 biomass (Fig 1), and the saprotrophic fungi *Agaricus arvensis*, *Fistulina hepatica* and  
272 *Fomitopsis pinicola* between 1.2-2.8 mg (Fig 2). For the intra-specific comparisons growth in  
273 the control treatment were mostly similar between isolates of the same species (Figs 3 and 4,  
274 S2 Table), with the exception for *Laccaria laccata* which varied greatly (2.1 mg and 33.5 mg,  
275 respectively).

276

277 **Fig 1. Mycorrhizal fungal growth responses to recalcitrant amine, amide and**  
278 **ammonium containing media.**

279 Biomass responses to treatments were compared to controls for mycorrhizal fungal species in  
280 a screening experiment including 2-diethylaminoethanol (2-diet), N<sub>3</sub>-Trimethyl(2-  
281 oxiranyl)methanaminium chloride (gly) and BAM at three different concentrations.  
282 Mycorrhizal species showed positive growth responses to all amine treatments exemplified by  
283 (a) *Rhizoscyphus ericae* and (b) *Hygrophorus camarophyllus*, positive growth responses to  
284 some amine treatments exemplified by (c) *Lactarius controversus* and (d) *Thelephora sp.*,  
285 negative responses to all treatments (e) *Amanita muscaria* and (f) *Cortinarius glaucopus*, (g)  
286 represents a commonly occurring species in boreal forests (*Piloderma crocuem*), and (h)  
287 *Tricholoma pessundatum* exemplifies a species which produced little biomass in the control  
288 and amine treatments.

289

290 **Fig 2. Saprotrophic fungal growth responses to recalcitrant amine, amide and**  
291 **ammonium containing media.**

292 Biomass responses to treatments as compared to controls for saprotrophic fungal species in a  
293 screening experiment including 2-diethylaminoethanol (2-diet), N<sub>3</sub>-Trimethyl(2-  
294 oxiranyl)methanaminium chloride (gly) and BAM at three different concentrations.  
295 Saprotrophic species showed positive growth responses to all amine treatments exemplified  
296 by (a) *Fomitopsis pinicola* (brown rot) and (b) *Mycena epipterygia* (litter decomposer), two  
297 brown rot fungi with positive growth responses to some amine treatments exemplified by (c)  
298 *Lycoperdon pyriforme* and (d) *Laetiporus sulphureus*, negative responses to all treatments (e)  
299 *Ganoderma applanatum* (brown rot) and (f) *Lenzites betula* (white rot), and two parasites (g)  
300 *Phanerochaete sordida* and (h) *Rhizina undulata*.

301

302 **Fig 3. Intra-specific mycorrhizal growth responses to recalcitrant amine, amide and**  
303 **ammonium containing media similar among isolates.**

304 The intra-specific variation in biomass responses to treatments compared to controls for  
305 mycorrhizal fungal species in a screening experiment including 2-diethylaminoethanol (2-  
306 diet), N<sub>3</sub>-Trimethyl(2-oxiranyl)methanaminium chloride (gly) and BAM at three different  
307 concentrations. (a) and (b) *Cenococcum geophilum*, (c) and (d) *Laccaria laccata*, (e) and (f)  
308 *Piceirhiza bicolorata*, (g) and (h) *Suillus variegatus*.

309

310 **Fig 4. Intra-specific saprotrophic growth responses to recalcitrant amine, amide and**  
311 **ammonium containing media similar among isolates.**

312 Intra-specific variation in biomass responses to treatments compared to controls for  
313 saprotrophic fungal species in a screening experiment including 2-diethylaminoethanol (2-

314 diet), N<sub>3</sub>-Trimethyl(2-oxiranyl)methanaminium chloride (gly) and BAM at three different  
315 concentrations. (a) and (b) *Armillaria mellea*, (c) and (d) *Hypholoma fasciculare*.

316

## 317 **General growth responses to N-containing compounds**

318 When fungi were exposed to individual compounds for two weeks most of the 48 isolates  
319 were able to survive in liquid media containing amines (S2 Table), and many species were  
320 either restricted compared to controls or inhibited. Average biomass production across all  
321 treatments was  $15.1 \pm 0.7$  mg, similar between mycorrhizal and saprotrophic fungi ( $15.9 \pm 0.9$   
322 mg and  $14.2 \pm 1.0$  mg, respectively), and ranging from no growth (values around zero; Fig  
323 1h) up to 65 mg (*Schizophyllum commune*, see S2 Table). The biomass values correspond to a  
324 growth increase relative the controls up to a 3640% increase (S2 Table, Figs 1-4). For some  
325 treatments where the final biomass production was around zero at harvest, the biomass from  
326 the first week of growth on basal Norkrans medium decreased when exposed to the selected  
327 compounds. In general, there were more negative growth responses to all three compounds  
328 than positive (S2 Table). Biomass production was positively affected by all three compounds  
329 for the mycorrhizal *Rhizoscyphus ericae* (up to 3600% growth increase; Fig 1a) and  
330 *Hygrophorus camarophyllus* (up to 150%; Fig 1b), and for the saprotrophic *Fomitopsis*  
331 *pinicola* (up to 1500% increase; Fig 2a), *Mycena epipterygia* (up to 450% Fig 2b) and *Rhizina*  
332 *undulata* (up to 150% Fig 2h). Negative effects by all three N-containing compounds at all  
333 three concentrations compared to controls were found for eight mycorrhizal fungi (*Amanita*  
334 *muscaria*, *Cortinarius glaucopus*, *Hebeloma sp. 1*, *Laccaria bicolor*, *Paxillus involutus*,  
335 *Piloderma byssinum*, *Suillus bovinus*, and *Suillus luteus*; S2 Table, Figs 1e and f), and for  
336 three saprotrophic fungi (*Ganoderma applanatum*, *Lenzites betulina* and *Hypholoma sp.*; S2  
337 Table, Fig 2e, Fig 2f and Fig 4e). The phylogenetic distribution of the 48 fungi plotted against  
338 the growth responses to the three highest compound concentrations showed that the ability for

339 fungal isolates to increase growth in the presence of the substances varies across the range of  
340 systematic entities and species (S3 Fig). Hence, no single evolutionary group seem to have a  
341 clear advantage in biodegrading these compounds, but rather that it appears to be important to  
342 apply an evolutionary broad screen when selecting suitable taxa. The multivariate analysis  
343 revealed no patterns in growth response for the different functional groups (Fig 5), neither for  
344 the main groups nor for the detailed rot types etc within the saprotrophic fungi. For systematic  
345 levels, the MRPP analyses showed significant differences between the two phyla  
346 *Basidiomycota* and *Ascomycota* (MRPP analysis;  $p=0.045$ ,  $A=0.025$ ), and between fungal  
347 orders (MRPP analysis;  $p=0.0067$ ,  $A=0.093$ ). The average biomass responses for each species  
348 to both controls and all treatments are shown in S4 Fig.

349

350 **Fig 5. Overall fungal biomass responses to the three tested recalcitrant compounds in**  
351 **the screening experiment.**

352 Principal component analysis (PCA) showing the variation in biomass responses for 48 fungal  
353 isolates when grown for three weeks in control treatment with nutrient solution and N-  
354 containing compounds' treatments (2-diethylaminoethanol [2-diet], N<sub>3</sub>-Trimethyl(2-  
355 oxiranyl)methanaminium chloride [gly] and BAM) at three different concentrations. Species  
356 differences are visualized by (a) a sample plot with the vector length indicating the relative  
357 importance of the amine treatments, and (b) a sample plot with species coded according to  
358 functional groups. The first three axes together explained 87.5% of the total variation  
359 (84181.4).

360

## 361 **Growth responses to specific N-containing compounds**

362 There were some general response patterns for growth on the individual compounds (see S2  
363 Table). For 2-diethylaminoethanol 19 out of 26 mycorrhizal isolates and 16 out of 22

364 saprotrophic isolates showed a negative growth response for all concentrations. For BAM 15  
365 mycorrhizal fungi and 15 saprotrophic fungi were negatively affected by all concentrations,  
366 followed by N<sub>3</sub>-trimethyl(2-oxiranyl)methanaminium chloride where eight mycorrhizal and  
367 three saprotrophic fungi were negatively affected. Among the mycorrhizal fungi, positive  
368 growth responses (for one or more concentrations) were most common when grown on N<sub>3</sub>-  
369 trimethyl(2-oxiranyl)methanaminium chloride; 13 mycorrhizal species (incl. *Amanita*  
370 *muscaria*, *Cenococcum geophilum*, *Hygrophorous amarophyllus*, both isolates of *Laccaria*  
371 *laccata*, *Lactarius controversus*, *Leccinum scabrum*, *Piloderma croceum*, *Pisolithus arhizus*,  
372 *Rhizopogon roseolus*, *Rhizoscyphus ericae*, *Suillus variegatus* (1<sup>st</sup> Sept 04), *Thelephora sp.*  
373 and *Tricholoma pessundatum*). Similarly, for saprotrophic fungi positive growth responses  
374 were most common when grown on N<sub>3</sub>-trimethyl(2-oxiranyl)methanaminium chloride; 19  
375 fungi with the exception of *Ganoderma applanatum* and *Hypholoma sp.* When comparing the  
376 intra-specific variation in biomass and growth responses to the N-containing compounds,  
377 patterns were very similar for all species except *Laccaria laccata* (Figs 3-4).

378

## 379 **Simulated process water experiment**

380 Based on growth data in the experiment, in combination with how easy the isolates were to  
381 grow in liquid culture, the mycorrhizal species *Rhizoscyphus ericae*, *Hygrophorus*  
382 *camarophyllus*, and *Laccaria laccata* AT2001038 were chosen for the simulated process  
383 water experiment. All three isolates survived and grew on the simulated process water (Fig 6).  
384 Net biomass and growth responses corresponded to 179 mg (380%), 292 mg (136%) and 336  
385 mg (292%) for *Laccaria laccata*, *Hygrophorus camarophyllus*, and *Rhizoscyphus ericae*,  
386 respectively.

387



388 **Fig 6. Biomass production for three mycorrhizal fungal species grown for three weeks in**  
389 **simulated process water.**

390 White bars show controls (one week in Basal Norkrans medium; n=2), grey bars show the  
391 simulated process water treatment (one initial week in Basal Norkrans medium followed by  
392 three weeks in amine solution (n=3).

393

## 394 **Discussion**

395 In a first experiment, the growth and survival of 48 fungal isolates with varying taxonomy and  
396 ecology on three different N-containing compounds (2-diethylaminoethanol, N<sub>3</sub>-trimethyl(2-  
397 oxiranyl)methanaminium chloride and BAM) at three concentrations were evaluated. The  
398 isolates belonged to the two main functional groups saprotrophic and mycorrhizal fungi,  
399 which are known for their complex enzyme systems used for depolymerizing organic matter  
400 [5, 8] ability to compete for nutrients in soil and woody substrates, as well as being relatively  
401 easy to grow in pure culture. Although many isolates were partly restricted or inhibited in  
402 growth in the presence of the selected substances, most survived. A subset of three  
403 mycorrhizal isolates, which were further tested in a simulated process water experiment,  
404 produced large biomass despite exposure to harsh conditions at which the compounds are  
405 present in large-scale manufacturing plants.

406

407 **Do fungal functional groups differ in their responses to individual**  
408 **N-containing compounds?**

409 Comparing the main functional groups, mycorrhizal and saprotrophic fungal isolates were  
410 able to produce similar amounts of biomass when grown in control treatments, and among the

411 saprotrophic fungi wood decomposing species with and without peroxidases (white and  
412 brown rot fungi, respectively) tended to grow better than the few species that are generalists.  
413 There was large inter-specific variation in growth among the tested isolates, which is in line  
414 with earlier studies conducted in pure culture [39, 40]. Low biomass production in some  
415 isolates may reflect slow growth rates for some species when grown in pure culture or  
416 indicate use of an unsuitable substrate for other isolates. Although many species were partly  
417 restricted or inhibited in growth, most survived when the selected compounds were added. This  
418 indicates an ability to utilize the compounds as substrates, and a large biomass was assumed  
419 to indicate fungal use via either enzymatic biodegradation, biosorption or bioaccumulation. In  
420 a previous study including 44 fungal isolates from vineyard soil and grapevine the ability to  
421 degrade biogenic amines was noteworthy for many fungi, and independent of the amine  
422 incorporated into the culture medium [41]. In the present study, mycorrhizal fungi showed  
423 generally more negative responses to all three N-containing compounds compared to the  
424 saprotrophic fungi, which probably reflects a higher ability of for example wood decomposers  
425 (white rot fungi) to tolerate toxic chemicals and environments within e.g. wood [42]. The  
426 non-specific degradation mechanisms using extracellular enzymes, allow lignolytic fungi to  
427 degrade a wide range of recalcitrant pollutants [1, 43-45]. Despite this general pattern when  
428 comparing responses to all three individual substances, some mycorrhizal isolates also coped  
429 well. For example, suilloid species (*Suillus spp.* and *Rhizopogon roseolus*) are well known to  
430 produce large amounts of biomass (e.g. [39]) and do so when exposed to amines, and these  
431 results were confirmed in the present screening study. Among the mycorrhizal species  
432 included in the study, we only had one isolate of the ascomycete forming ericoid mycorrhiza  
433 (*Rhizoscyphus ericae*), which was chosen for the simulated process water experiment due to a  
434 strongly positive biomass response to the N-containing compounds. This species belongs to  
435 an aggregate of species [46] also including *Piceirhiza bicolorata* with yet unclear systematic

436 affinities, which can form ECM associations. The species aggregate is of special interest in  
437 the context of withstanding or metabolising N-containing compounds of the type included in  
438 our study, since they possess a wide range of biochemical and physiological attributes  
439 enabling the fungus to cope with the harsh and stressed habitats of ericoid plants [47]. It was  
440 clear from the screening experiment that all three isolates from this species aggregate produce  
441 very large amounts of biomass in the current set-up. Experimental studies have confirmed  
442 their saprotrophic capabilities [48] with a wide range of extracellular enzymes, and they are  
443 known to utilize ammonium, nitrate, organic substances like amino acids [49] and their  
444 amides [50], and proteins [51]. Further, *R. ericae* is able to mobilize organic N also from  
445 even more recalcitrant sources such as lignin [52] and chitin [53, 54]. *Laccaria laccata*, one  
446 of the ectomycorrhizal species included in the simulated process water experiment, is mainly  
447 an early succession ectomycorrhizal fungus ranging widely over the world and known to be  
448 easy to grow in liquid culture [55]. The species, which is used and commonly occurring in  
449 nursery seedlings [56], has a wide host range, ease of forming ectomycorrhizal synthesis and  
450 potential as biological control agent against disease causing fungi such as members of the  
451 genus *Fusarium* [57]. Although ectomycorrhizal fungi such as *Laccaria laccata* degrade  
452 pollutants and expedite removal of persistent organic pollutants [58, 59], it is unknown  
453 whether the species can metabolise amines, amides or quaternary ammonium compounds.  
454 However, the closely related species *Laccaria bicolor* was previously shown to be unable to  
455 grow on media containing amines as sole N sources [60] and is suggested in nature to use the  
456 ammonium produced either by microbial or chemical amine decomposition since it has been  
457 shown to have little or no ability to grow on organic N sources [61]. The main conclusion of  
458 the growth experiment including either 2-diethylaminoethanol, N<sub>3</sub>-trimethyl(2-  
459 oxiranyl)methanaminium chloride or BAM was that many fungal isolates survived and grew  
460 in the presence of these N-containing compounds.

461

## 462 **Simulated process water experiment**

463 In the simulated process water, all three tested species grew well, and the addition of salts did  
464 not seem to significantly prevent their growth. The fungi most likely continued to use the  
465 Basal Norkrans medium as nutrients in the three weeks period including the simulated process  
466 water, however, the excess of test solution in combination with the large biomass indicated  
467 that the fungi used the N-containing compounds in the process waters as substrates for  
468 growth. *Rhizoscyphus ericae* produced the largest biomass (ca. 340 mg) and *Laccaria laccata*  
469 showed the highest growth increase. The observed growth of the fungi on the N-containing  
470 substrates was most likely explained by either extracellular or endo-enzymatic degradation  
471 mechanisms. In the first case, the products from the biodegraded compounds must penetrate  
472 the fungal cell bi-layers, and in the endo-enzymatic mechanism, the native substances are  
473 transported through the membranes for further degradation within the cells. Several kinds of  
474 filamentous fungi are known to produce amine oxidase activity when using amines as a sole N  
475 source for growth [62-64]. Two kinds of amine oxidases were the first to be purified and  
476 characterized from fungi [65, 66], later followed by studies revealing other types of amine  
477 oxidases (e.g. [67]). The enzymes catalyze the oxidative deamination of terminal amino  
478 groups, allowing the fungi to degrade an amine as a source of ammonium for growth. This  
479 would explain the ability of many fungal isolates to increase biomass in the presence of  
480 amines, since N often is the most growth-limiting nutrient. In the present study, the C:N ratio  
481 of the simulated process water was low (5.1) and most of the N was not present in a directly  
482 available form, thus the fungi must have the ability to metabolise the selected substrates to  
483 promote uptake and biomass production. This, however, needs to be confirmed by for  
484 example analyzing residual N-containing compounds in the liquid media or investigating the  
485 potential presence of amine oxidases and other relevant enzymes than can catalyze the

486 investigated compounds. Amine oxidase activity was first observed in strains of *Aspergillus*  
487 *niger*, *Aspergillus fumigatus*, *Penicillium chrysogenum* and *Penicillium notatum* [65], which  
488 are well-known representatives of the order Eurotiales in *Ascomycota*. In a more recent study  
489 evaluating the ability of vineyard soil and grapevine fungi to degrade biogenic amines  
490 *Penicillium* spp., *Alternaria* sp., *Phoma* sp., *Ulocladium chartarum* and *Epicoccum nigrum*  
491 showed high capacity to *in vitro* amine degradation in a microfermentation system [41]. These  
492 are also species within *Ascomycota*, where all (except *Penicillium*) belong to the order  
493 Pleosporales. In the present study we did not include any species from these orders, since we  
494 focused mainly on fruitbody forming saprotrophic and mycorrhizal fungi belonging to  
495 *Basidiomycota*, with a few exceptions found in *Ascomycota*. The species included here  
496 represent other ecological groups of fungi compared to the examples from Pleosporales and  
497 Eurotiales. Amine oxidase activity was previously detected in one basidiomycotous species,  
498 which is also included in the present study, *Armillaria* (saprotroph/parasite), in a large  
499 screening study investigating 85 fungal isolates [66], along with a number of species  
500 belonging to *Ascomycota*. Beside from these studies, little is known about the distribution of  
501 the enzyme systems in fungal strains from different ecosystems, and as far as we are aware, it  
502 is unknown whether amino oxidases are present in most saprotrophic or mycorrhizal fungi. In  
503 future studies, it would be of interest to design the experiments so that concentration changes  
504 in N-containing compounds can be measured, requiring lower substrate amounts.

505

506 In summary, the feasibility of growing fungi for metabolizing recalcitrant N containing  
507 compounds, including an amine, an amide and a quaternary compound, in wastewater was  
508 tested, utilising part of the large fungal species diversity in Northern European forests. The  
509 species included in the present study differed from earlier studies of filamentous fungi in the  
510 context of e.g. amine oxidation of these substances, since they belong to the functional groups

511 wood and litter decomposers, and mycorrhizal fungi. Although many isolates were partly  
512 restricted or inhibited in growth, most survived in the presence of 2-diethylethanolamine, N<sub>3</sub>-  
513 trimethyl(2-oxiranyl)methanaminium chloride and BAM. The observed growth on these  
514 compounds is to our knowledge not previously reported. The most promising fungi of those  
515 were tested, when growth data were considered, was the ECM fungus *Laccaria laccata* and  
516 the ericoid mycorrhizal fungus *Rhizoscyphus ericae*. In addition to the saprotrophic fungi,  
517 especially fungi with peroxidases, which are used in whole cell fungal treatments within  
518 industry, mycorrhizal fungi showed potential as alternatives for treatments of wastewater  
519 containing the investigated N containing substances. However, this first screening study needs  
520 to be followed by more in-depth studies confirming decreased concentrations of these  
521 substances.

522

## 523 **Acknowledgements**

524 We are grateful to Dr. Rimvydas Vasaitis at Department of Forest Mycology and Plant  
525 Pathology for supplying fungal isolates, and Dr. Robert Burman, Medical Products Agency,  
526 Uppsala, Sweden for his contribution in the simulated process water experiment.

527

## 528 **References**

- 529 1. Brar SK, Verma M, Surampalli, RY, Misra K, Tyagi RD, Meunier N, Blais JF.  
530 Bioremediation of hazardous wastes-a review. Practice Periodical of Hazardous, Toxic,  
531 and Radioactive Waste Management 2006;10(2):59-72.  
532 [http://dx.doi.org/10.1061/\(ASCE\)1090-025X\(2006\)10:2\(59\)](http://dx.doi.org/10.1061/(ASCE)1090-025X(2006)10:2(59))

533

- 534 **2.** Sankaran S, Khanal SK, Jasti N, Jin B, Pometto III AL, van Leeuwen H. Use of  
535 filamentous fungi for wastewater treatment and production of high value fungal  
536 byproducts: a review. *Crit Rev in Env Sci Tech.* 2010; 40: 400-449.  
537 <http://dx.doi.org/10.1080/10643380802278943>  
538
- 539 **3.** Eastwood DC, Floudas D, Binder M., Majcherczyk A, Schneider P, Aerts A, Asiegbu  
540 FO, et al. The plant cell wall–decomposing machinery underlies the functional diversity  
541 of forest fungi. *Science.* 2011; 333: 762-765. <http://dx.doi.org/10.1126/science.1205411>  
542
- 543 **4.** Kohler A, Kuo A, Nagy LG, Morin E, Barry KW, Buscot F, et al. Convergent losses of  
544 decay mechanisms and rapid turnover of symbiosis genes in mycorrhizal mutualists.  
545 *Nature Genetics.* 2015; 47: 410-415. <http://dx.doi.org/10.1038/ng.3223>  
546
- 547 **5.** Rayner ADM, Boddy L. *Fungal decomposition of wood: its biology and ecology.* Wiley  
548 and Sons, New York. 1988. 587 p.  
549
- 550 **6.** Smith SE, Read DJ. *Mycorrhizal Symbiosis.* 3<sup>rd</sup> edition. San Diego, CA, USA: Academic  
551 Press. 2008, 788 pp.  
552
- 553 **7.** Meharg AA, Cairney JWG. Ectomycorrhizas-extending the capabilities of rhizosphere  
554 remediation. *Soil Biol & Chem.* 2000; 32: 1475-1484. [http://dx.doi.org/10.1016/S0038-](http://dx.doi.org/10.1016/S0038-0717(00)00076-6)  
555 [0717\(00\)00076-6](http://dx.doi.org/10.1016/S0038-0717(00)00076-6)  
556

- 557 **8.** Lindahl BD, Tunlid A. Ectomycorrhizal fungi – potential organic matter decomposers,  
558 yet not saprotrophs. *New Phytologist*. 2015; 205: 1443-1447.  
559 <http://dx.doi.org/10.1111/nph.13201>  
560
- 561 **9.** Bödeker ITM, Nygren CMR, Taylor AFS, Olson Å, Lindahl BD. Class II peroxidase-  
562 encoding genes are present in a phylogenetically wide range of ectomycorrhizal fungi.  
563 *ISME Journal*. 2009; 3: 1387–1395.  
564
- 565 **10.** Bödeker ITM, Clemmensen KE, de Boer W, Martin F, Olson Å, Lindahl BD.  
566 Ectomycorrhizal *Cortinarius* species participate in enzymatic oxidation of humus in  
567 northern forest ecosystems. *New Phytologist*. 2014; 203: 245–256.  
568
- 569 **11.** Rineau F, Roth D, Shah F, Smits M, Johansson T, Canback B, et al. The ectomycorrhizal  
570 fungus *Paxillus involutus* converts organic matter in plant litter using a trimmed brown-  
571 rot mechanism involving Fenton chemistry. *Env Microbiol*. 2012; 14: 1477–1487.  
572 <http://dx.doi.org/10.1111/j.1462-2920.2012.02736.x>  
573
- 574 **12.** Hyde KD, Tennakoon D, Jeewon R, Bhat DJ. The amazing potential of fungi: 50 ways  
575 we can exploit fungi industrially. *Fungal Diversity*. 2019; 97:1–136.  
576 <http://dx.doi.org/10.1007/s13225-019-00430-9>  
577
- 578 **13.** Gadd GM. Fungi in bioremediation. (edited by Gadd GM). British Mycological Society  
579 Symposium Series 23. Cambridge University Press, Cambridge, UK, pp 481. 2001.  
580 <http://dx.doi.org/10.1017/CBO9780511541780>  
581



- 582 **14.** Deshmukh C, Khardenavis AA, Purohit HJ. Diverse metabolic capacities of fungi for  
583 bioremediation. *Indian J Microbiol.* 2016; 56: 247–264.  
584
- 585 **15.** Cruz-Morató C, Ferrando-Climent L, Rodriguez-Mozaz S, Barceló D, Marco-Urrea E,  
586 Vincent T, et al. Degradation of pharmaceuticals in non-sterile urban wastewater by  
587 *Trametes versicolor* in a fluidized bed bioreactor. *Water Res.* 2013; 47: 5200-5210.  
588 <http://dx.doi.org/10.1016/j.watres.2013.06.007>  
589
- 590 **16.** Zhang Y, Geißen SU. Elimination of carbamazepine in a non-sterile fungal bioreactor.  
591 *Bioresource Tech.* 2012; 112: 221-227. <http://dx.doi.org/10.1016/j.biortech.2012.02.073>  
592
- 593 **17.** Spina F, Anastasi A, Prigione V, Tigini V, Varese GC. Biological treatment of  
594 industrial wastewaters: a fungal approach. *Chem Eng Trans.* 2012; 27: 175-80.  
595
- 596 **18.** Marco-Urrea E, Pérez-Trujillo M, Cruz-Morató C, Caminal G, Vicent T.  
597 Degradation of the drug sodium diclofenac by *Trametes versicolor* pellets and  
598 identification of some intermediates by NMR. *J Hazard Mater.* 2010; 176: 836-  
599 842. <http://dx.doi.org/10.1016/j.jhazmat.2009.11.112>  
600
- 601 **19.** Hai FI, Yamamoto K, Nakajima F, Fukushi K. Application of a GAC-coated hollow fiber  
602 module to couple enzymatic degradation of dye on membrane to whole cell  
603 biodegradation within a membrane bioreactor. *J Membrane Sci.* 2012; 389: 67-75.  
604 <http://dx.doi.org/10.1016/j.memsci.2011.10.016>  
605
- 606 **20.** Lloret L, Eibes G, Lú-Chau TA, Moreira MT, Feijoo G, Lema JM. Laccase-catalyzed

- 607 degradation of anti-inflammatories and estrogens. *Biochem Eng J.* 2010; 51: 124-131.  
608 <http://dx.doi.org/10.1016/j.bej.2010.06.005>  
609
- 610 **21.** Emtiazi G, Satarii M, Mazaherion F. The utilization of aniline chlorinated aniline, and  
611 aniline blue as the only source of nitrogen by fungi in water. *Wat Res.* 2001; 35(5): 1219-  
612 1224. [http://dx.doi.org/10.1016/S0043-1354\(00\)00370-5](http://dx.doi.org/10.1016/S0043-1354(00)00370-5)  
613
- 614 **22.** Esteve-Núñez A, Caballero A, Ramos JL. Biological degradation of 2,4,6-trinitrotoluene.  
615 *Microbiol Mol Biol Rev.* 2001; 65(3): 335-352.  
616 <http://dx.doi.org/10.1128/MMBR.65.3.335-352.2001>  
617
- 618 **23.** Hammel KE, Kapich AN, Jensen Jr. KA, Ryan ZC. Reactive oxygen species as agents of  
619 wood decay by fungi. *Enzyme Microbial Techn.* 2002; 30: 445-453.  
620 [http://dx.doi.org/10.1016/S0141-0229\(02\)00011-X](http://dx.doi.org/10.1016/S0141-0229(02)00011-X)  
621
- 622 **24.** Pankay MV, Goyal S, Patnala PK. Treatment methods for the remediation of amines: a  
623 review. *Mat Sci Forum.* 2012; 712: 147-173.  
624  
625
- 626 **25.** Negrón-Encarnación I, Arce R. Light-induced transformations of aza-aromatic  
627 pollutants adsorbed on models of atmospheric particulate matter: Acridine and 9 (10-H)  
628 acridone. *Atmos Environ.* 2007; 41: 6771-6783.  
629
- 630 **26.** Ikehata K, Naghashkar NJ, El-Din MG. Degradation of aqueous pharmaceuticals  
631 by ozonation and advanced oxidation processes: a review. *Ozone-Sci Eng.* 2006; 28: 353-

- 632 414. <http://dx.doi.org/10.1080/01919510600985937>
- 633
- 634 **27.** Swamy J, Ramsay JA. The evaluation of white rot fungi in the decoloration of textile  
635 dyes. *Enzyme Microbial Techn.* 1999; 24: 130-137. <http://dx.doi.org/10.1016/S0141->  
636 [0229\(98\)00105-7](http://dx.doi.org/10.1016/S0141-0229(98)00105-7)
- 637
- 638 **28.** Bardi A, Yuan Q, Tigini V, Spina F, Varese GC, Spennati F et al. Recalcitrant  
639 compounds removal in raw leachate and synthetic effluents using the white-rot fungus  
640 *Bjerkandera adusta*. *Water.* 2017; 9, 824: 1-14. <http://dx.doi.org/10.3390/w9110824>
- 641
- 642 **29.** Stenholm A, Hedeland M, Arvidsson T, Pettersson CE. Removal of diclofenac from a  
643 non- sterile aqueous system using *Trametes versicolor* with an emphasis on  
644 adsorption and biodegradation, mechanisms. *Environmental Technology.* 2019; 40(19):  
645 2460-2472. <http://dx.doi.org/10.1080/09593330.2018.1444098>
- 646
- 647 **30.** Zavareh S, Avanes A, Beiramyan, P. Effective and selective removal of aromatic amines  
648 from water by Cu<sup>2+</sup>-treated chitosan/alumina nanocomposite. *Adsorption Sci Techn.*  
649 2017; 35(1-2): 218-240.
- 650
- 651 **31.** Ellegard-Jenssen L, Horemans B, Raes B, Aamand J. Groundwater contamination with  
652 2,6-dichlorobenzamide (BAM) and perspectives for its microbial removal. *Appl*  
653 *Microbial Biotechnol.* 2017; 101: 5235-5245. <http://dx.doi.org/10.1007/s00253-017->  
654 [8362-x](http://dx.doi.org/10.1007/s00253-017-8362-x)
- 655

- 656 **32.** Dyntaxa (2017). Svensk taxonomisk databas. [Cited 2019 November 14]. Available from  
657 [www.dyntaxa.se](http://www.dyntaxa.se)  
658
- 659 **33.** Hallingbäck T, Aronsson G. Macrofungi and myxomycetes of Sweden and their ecology.  
660 ArtDatabanken, SLU, Uppsala, 2<sup>nd</sup> revised and extended printing. 1998.  
661
- 662 **34.** Marx DH. The influence of ectotrophic ectomycorrhizal fungi on the resistance of pine  
663 roots to pathogen infections I, Antagonism of mycorrhizal fungi to root pathogenic fungi  
664 and soil bacteria. *Phytopathology*. 1969; 59: 153–163.  
665
- 666 **35.** Norkrans B. Studies in growth and cellulolytic enzymes of *Tricholoma* with special  
667 reference to mycorrhiza formation. *Symbolae Botanicae Upsalienses* XI:1 , A.-B.  
668 Lundequistska Bokhandeln, Uppsala. 1950.  
669
- 670 **36.** Geyer H, Viswanathan R, Freitag D, Korte F. Relationship between water solubility of  
671 organic chemicals and their bioaccumulation by the alga *Chlorella*. *Chemosphere*. 1981;  
672 10:1307-1313. [http://dx.doi.org/10.1016/0045-6535\(81\)90048-5](http://dx.doi.org/10.1016/0045-6535(81)90048-5)  
673
- 674 **37.** Mccune, B.a.M.J.M. (2006). PC-ORD. Multivariate analysis of ecological data, version  
675 5.0 for Windows ed.: MjM Software, Gleneden Beach, Oregon, USA.  
676
- 677 **38.** Mccune, B., and Grace, JB. (2002). *Analysis of ecological communities*. MjM Software  
678 Design.  
679

- 680 **39.** Fransson PMA, Anderson IC, Alexander IJ. Ectomycorrhizal fungal isolates respond  
681 differently to increased carbon availability. *FEMS Microbiol Ecol.* 2007. 61: 246–257.  
682 <http://dx.doi.org/10.1111/j.1574-6941.2007.00343.x>  
683
- 684 **40.** Johansson EM, Fransson PMA, Finlay RD, van Hees PAW. Quantitative analysis of  
685 exudates from soil-living basidiomycetes in pure culture as a response to lead, cadmium  
686 and arsenic stress. *Soil Biol Biochem.* 2008; 40: 2225-2236.  
687 <http://dx.doi.org/10.1016/j.soilbio.2008.04.016>  
688
- 689 **41.** Cueva C, Garcia-Ruiz A, González-Rompinelli E, Bartolome B, Martin-Álvarez P.J.,  
690 Salazar O, et al. Degradation of biogenic amines by vineyard ecosystem fungi. Potential  
691 use in winemaking. *J Appl Microbiol.* 2012; 112:672-682.  
692 <http://dx.doi.org/10.1111/j.1365-2672.2012.05243.x>  
693
- 694 **42.** Asgher A, Bhatti H, Ashraf M, Legge RL. Recent developments in biodegradation of  
695 industrial pollutants by white rot fungi and their enzyme system. *Biodegradation.* 2008;  
696 19(6): 771-783. <http://dx.doi.org/10.1007/s10532-008-9185-3>  
697
- 698 **43.** Barr D, Aust SD. Mechanisms white rot fungi use to degrade pollutants. *Environ Sci*  
699 *Technol.* 1994; 28: 78-87. <http://dx.doi.org/10.1021/es00051a724>  
700
- 701 **44.** Raghukumar T, D'Souza MD, Thorn RG, Reddy CA. White rot-lignin-modifying fungus  
702 *Flavodon flavus* and a process for removing dye from dye containing water or soil using  
703 the fungus. 2002. Patent No. US6395534.  
704

- 705 **45.** Singh T, Singh AP. White and brown rot fungi as decomposers of lignocellulosic  
706 materials and their role in waste and pollution control. In: Purchase D, editor. Fungal  
707 applications in sustainable environmental biotechnology, Fungal Biology. Springer  
708 International Publishing Switzerland; 2016. pp 233-247.  
709
- 710 **46.** Vrålstad T, Fossheim T, Schumacher T. *Piceirhiza bicolorata* the ectomycorrhizal  
711 expression of the *Hymenoscyphus ericae* aggregate? New Phytologist. 2000; 145: 549-  
712 563. <http://dx.doi.org/10.1046/j.1469-8137.2000.00605.x>  
713
- 714 **47.** Read DJ. The structure and function of the ericoid mycorrhizal root. Annals of Botany.  
715 1996; 77: 365-374. <http://dx.doi.org/10.1006/anbo.1996.0044>  
716
- 717 **48.** Read DJ, Perez-Moreno J. Mycorrhizas and nutrient cycling in ecosystems - a journey  
718 towards relevance. New Phytologist. 2003; 157: 475-492.  
719 <http://dx.doi.org/10.1046/j.1469-8137.2003.00704.x>  
720
- 721 **49.** Stribley DP, Read DJ. The biology of mycorrhiza in the Ericaceae. VII. The relationship  
722 between mycorrhizal infection and the capacity to utilize simple and complex organic  
723 nitrogen sources. New Phytologist. 1980; 86: 365-371. <http://dx.doi.org/10.1111/j.1469-8137.1980.tb01677.x>  
724  
725
- 726 **50.** Bajwa R, Read DJ. Utilization of mineral and amino N sources by the ericoid  
727 mycorrhizal endophyte *Hymenoscyphus ericae* and by mycorrhizal and non-mycorrhizal  
728 seedlings of *Vaccinium*. Trans Br Mycol Soc. 1986; 87(2): 269-277.  
729 [http://dx.doi.org/10.1016/S0007-1536\(86\)80030-4](http://dx.doi.org/10.1016/S0007-1536(86)80030-4)

730

731 **51.** Leake JR, Read DJ. The biology of mycorrhiza in the *Ericae*. New Phytol. 1989; 112: 69-  
732 76.

733

734 **52.** Haselwandter K, Bobleter O, Read DJ. Degradation of <sup>14</sup>C-labeled lignin and  
735 dehydropolymer of coniferyl alcohol by ericoid and ectomycorrhizal fungi. Archives of  
736 Microbiology. 1990; 153: 352-354. <http://dx.doi.org/10.1007/BF00249004>

737

738 **53.** Leake JR, Read DJ. Chitin as a nitrogen source for mycorrhizal fungi. Mycological Res.  
739 1990; 94: 993-995. [http://dx.doi.org/10.1016/S0953-7562\(09\)81318-X](http://dx.doi.org/10.1016/S0953-7562(09)81318-X)

740

741 **54.** Kerley SJ, Read DJ. The biology of mycorrhiza in the Ericaceae. XVIII. Chitin  
742 degradation by *Hymenoscyphus ericae* and transfer of chitin-nitrogen to the host plant.  
743 New Phytologist. 1995; 131: 369-375. [http://dx.doi.org/10.1111/j.1469-](http://dx.doi.org/10.1111/j.1469-8137.1995.tb03073.x)  
744 [8137.1995.tb03073.x](http://dx.doi.org/10.1111/j.1469-8137.1995.tb03073.x)

745

746 **55.** Kuek C. Shake-flask culture of *Laccaria laccata*, an ectomycorrhizal basidiomycete.  
747 Appl Microbiol Biotechnol. 1996; 45: 319–326.  
748 <http://dx.doi.org/10.1007/s002530050690>

749

750 **56.** Hung LL, Molina R. Use of the ectomycorrhizal fungus *Laccaria laccata* in forestry. III.  
751 Effects of commercially produced inoculum on container-grown Douglas fir and  
752 Ponderosa pine seedling. Canadian J of Forestry Res. 1986; 16: 802-806.  
753 <http://dx.doi.org/10.1139/x86-142>

754

- 755 **57.** Machón P, Pajares JA, Diez JJ, Alves-Santos FM. Influence of the ectomycorrhizal  
756 fungus *Laccaria laccata* on pre-emergence, post-emergence and late damping-off by  
757 *Fusarium oxysporum* and *F. verticillioides* on Stone pine seedlings. *Symbiosis*. 2009; 49:  
758 101-109. <http://dx.doi.org/10.1007/s13199-009-0015-0>  
759
- 760 **58.** Genney DR, Alexander IJ, Killham K, Meharg AA. Degradation of the polycyclic  
761 aromatic hydrocarbon (PAH) fluorene is retarded in a Scots pine ectomycorrhizosphere.  
762 *New Phytologist*. 2004; 163: 641-649. [http://dx.doi.org/10.1111/j.1469-](http://dx.doi.org/10.1111/j.1469-8137.2004.01131.x)  
763 [8137.2004.01131.x](http://dx.doi.org/10.1111/j.1469-8137.2004.01131.x)  
764
- 765 **59.** Heinonsalo J, Jørgensen KS, Haahtela K, Sen R. Effects of *Pinus sylvestris* root growth  
766 and mycorrhizosphere development on bacterial carbon source utilization and  
767 hydrocarbon oxidation in forest and petroleum-contaminated soils. *Canadian J Microbiol.*  
768 2000; 46: 451-464. <http://dx.doi.org/10.1139/cjm-46-5-451>  
769
- 770 **60.** Yamanaka T. Utilisation of inorganic and organic nitrogen in pure cultures by  
771 saprotrophic and ectomycorrhizal fungi producing sporophores on urea-treated forest  
772 floor. *Mycolog Res*. 1999; 103: 811–816. <http://dx.doi.org/10.1017/S0953756298007801>  
773
- 774 **61.** Lucic E, Fourrey C, Kohler A, Martin F, Chalot M Brun-Jacob A. A gene repertoire  
775 for nitrogen transporters in *Laccaria bicolor*. *New Phytologist*. 2008; 180:343-364.  
776 <http://dx.doi.org/10.1111/j.1469-8137.2008.02580.x>  
777
- 778 **62.** Yamada H, Adachi O, Ogata K. Amine oxidases of microorganisms. *Agr. Bio. Chem.*  
779 1965; 29(2):117-123. <http://dx.doi.org/10.1080/00021369.1965.10858361>



780

781 **63.** Adachi O, Yamada H. Amine oxidases of microorganisms. Part VIII. Purification and  
782 properties of amine oxidase from *Fusarium culmorum*. Res Inst Food Sci, Kyoto  
783 University. 2001; 31: 10–18.

784

785 **64.** Isobe, K., Tani, Y. and Yamada, H. Crystallization and characterization of agmatine  
786 oxidase from *Penicillium chrysogenum*. Agric Biol Chem. 1982; 46: 1353–1359.  
787 <http://dx.doi.org/10.1271/bbb1961.46.1353>

788

789 **65.** Frébort I, Matsushita K, Adachi O. The fungus *Gibberella fujikuroi* produces a copper/  
790 topaquinone-containing amine oxidase when induced by n-butylamine. Biochem  
791 Mol Biol Int. 1997a; 41: 11–23. <http://dx.doi.org/10.1080/15216549700201011>

792

793 **66.** Frébort I, Matsushita K, Adachi O. Involvement of multiple copper/topaquinone-  
794 containing and flavincontaining amine oxidases and NAD(P)<sup>+</sup> aldehyde dehydrogenases  
795 in amine degradation by filamentous fungi. J Ferm Bioeng. 1997b; 84: 200–212.  
796 [http://dx.doi.org/10.1016/S0922-338X\(97\)82055-7](http://dx.doi.org/10.1016/S0922-338X(97)82055-7)

797

798 **67.** Sugawara, A., Matsui, D., Komeda, H., Asano, Y., and Isobe, K. Characterization  
799 and application of aminoamide-oxidizing enzyme from *Aspergillus carbonarius* AIU  
800 205, J. Biosci. Bioeng. 2014; 117: 263-268.  
801 <http://dx.doi.org/10.1016/j.jbiosc.2013.08.019>

802

803 **68.** Brand F, Gronbach E, Taylor AFS. *Piceirhiza Bicolorata*. Colour Atlas of  
804 Ectomycorrhizae (edited by Agerer R), plate 73. Einhorn-Verlag, Schwäbisch Gmünd.  
805 1992.

806

807 **69.** Hambleton S, Sigler L. *Meliniomyces* a new anamorph genus for root-associated fungi  
808 with phylogenetic affinities to *Rhizoscyphus ericae* (*Hymenoscyphus ericae*),  
809 *Leotiomyces* *Stud Mycol.* 2005; 53: 1–27. <http://dx.doi.org/10.3114/sim.53.1.1>

810

## 811 **Supporting information**

812

### 813 **S1 Fig. Experimental scheme for the screening experiment.**

814 A total of 48 fungal isolates were grown in Petri dishes for a total of three weeks in liquid  
815 growth media containing individual recalcitrant compounds. Concentrations for the N-  
816 containing compounds were 1 g/L, 10 g/L and 20 g/L for 2-diethylaminoethanol and N<sub>3</sub>-  
817 Trimethyl(2-oxiranyl)methanaminium chloride, and for BAM 1 µL, 1 mL and 2 mL were  
818 added from a saturated solution. No substance was added to the growth controls. The  
819 recalcitrant N-containing compounds are depicted to the right.

820

### 821 **S1 Table. Mycorrhizal and saprotrophic fungal isolates.**

822 The fungal isolates were used to screen for survival and growth in liquid media containing  
823 recalcitrant amine, amide and ammonium compounds.

824

### 825 **S2 Fig. Experimental scheme for the simulated process water experiment.**

826 Three mycorrhizal fungal species (*Hygrophorus camarophyllus*, *Rhizoscyphus ericae* and  
827 *Laccaria laccata*) were grown for a total of four weeks in Erlenmeyer flasks containing a  
828 recalcitrant amine/amide mixture. For composition of mixture see Table 1.

829

830 **S2 Table. Biomass production by 48 fungal isolates grown for three weeks in liquid**  
831 **culture in the presence of three individual recalcitrant N-containing compounds.**

832

833 **S3 Fig. The phylogenetic distribution of 48 fungal isolates included in the screening**  
834 **experiment, plotted against the growth responses.**

835 The growth responses represent the isolates (% of controls) containing the three highest N-  
836 containing compounds' concentrations. Concentrations corresponded to 20 g/L for 2-  
837 diethylaminoethanol (blue bars) and N<sub>3</sub>-Trimethyl(2-oxiranyl)methanaminium chloride  
838 (orange bars), and addition of 2 mL saturated BAM solution (red bars). Values over 100%  
839 means that fungi grew better with the amines present. The red branches are ECM fungi, the  
840 blue saprotrophs and the green ericoid mycorrhiza. The diagram was cut at 500%, missing  
841 values and negative values were set to 0%.

842

843 **S4 Fig. Principal component analysis (PCA) showing the overall variation in fungal**  
844 **biomass responses to three recalcitrant N-containing compounds.** 48 fungal isolates when  
845 grown for three weeks in control treatment with nutrient solution and amine treatments (2-  
846 diethylaminoethanol [2-diet], N<sub>3</sub>-Trimethyl(2-oxiranyl)methanaminium chloride [gly] and  
847 BAM) at three different concentrations. Species differences are visualized by a sample plot  
848 with circle size depicting the average biomass response across all treatments. The first three  
849 axes together explained 87.5% of the total variation (84181.4).

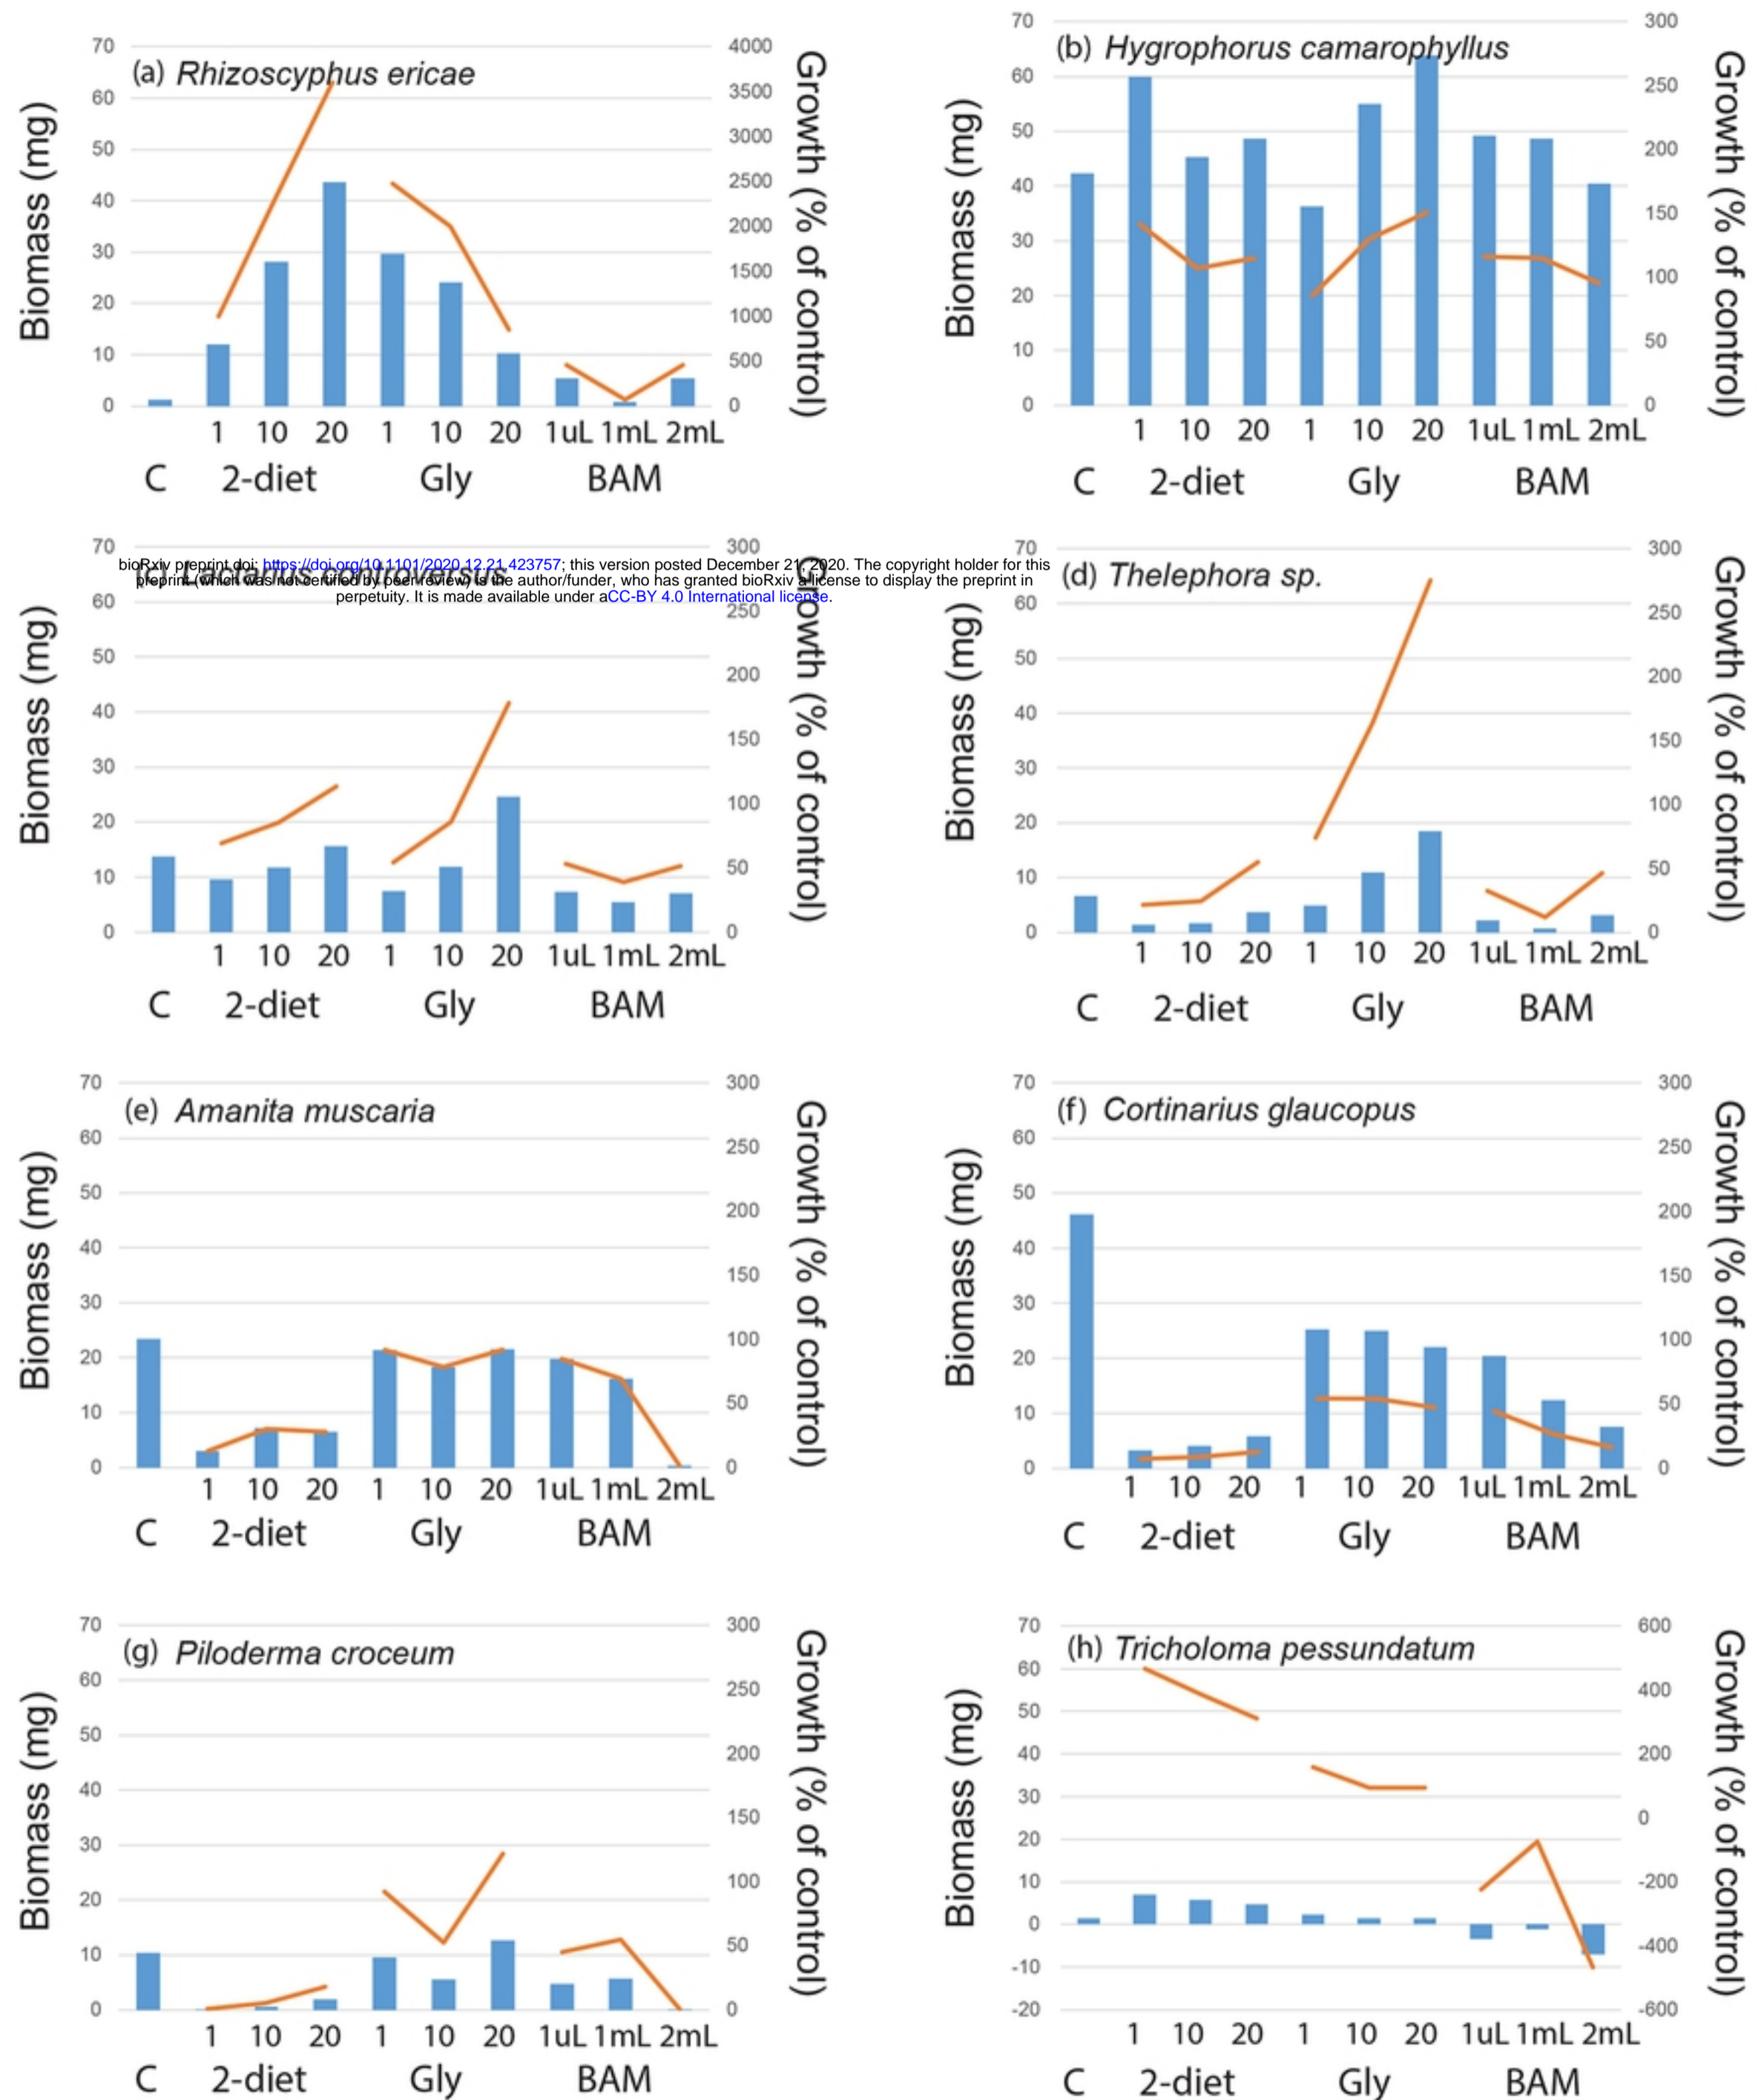



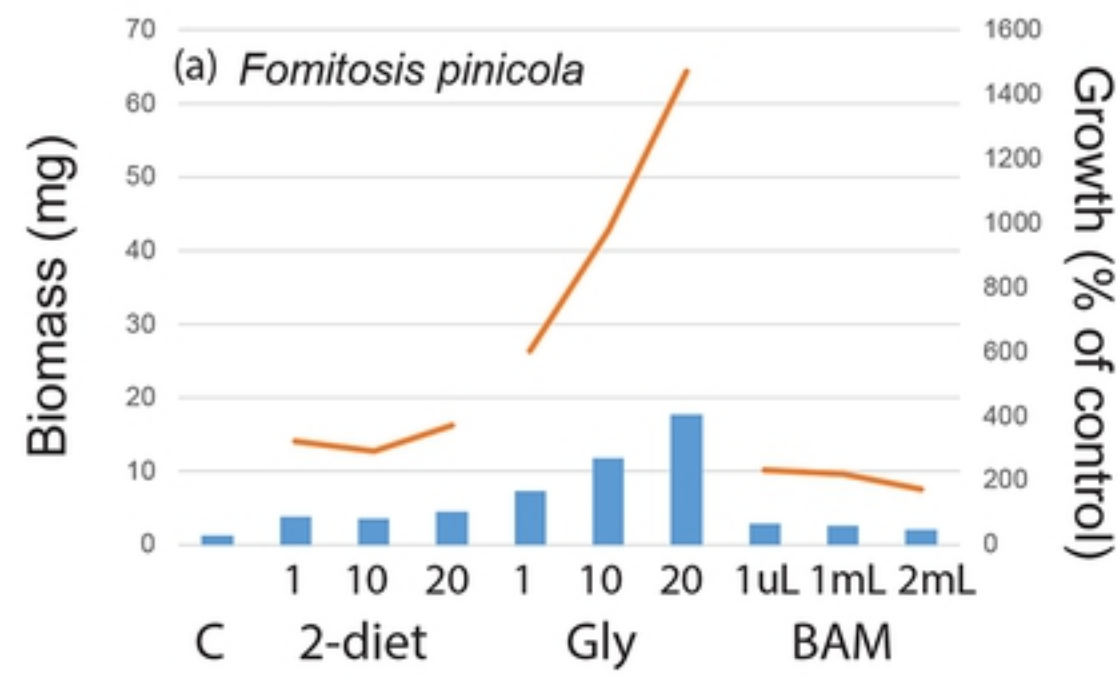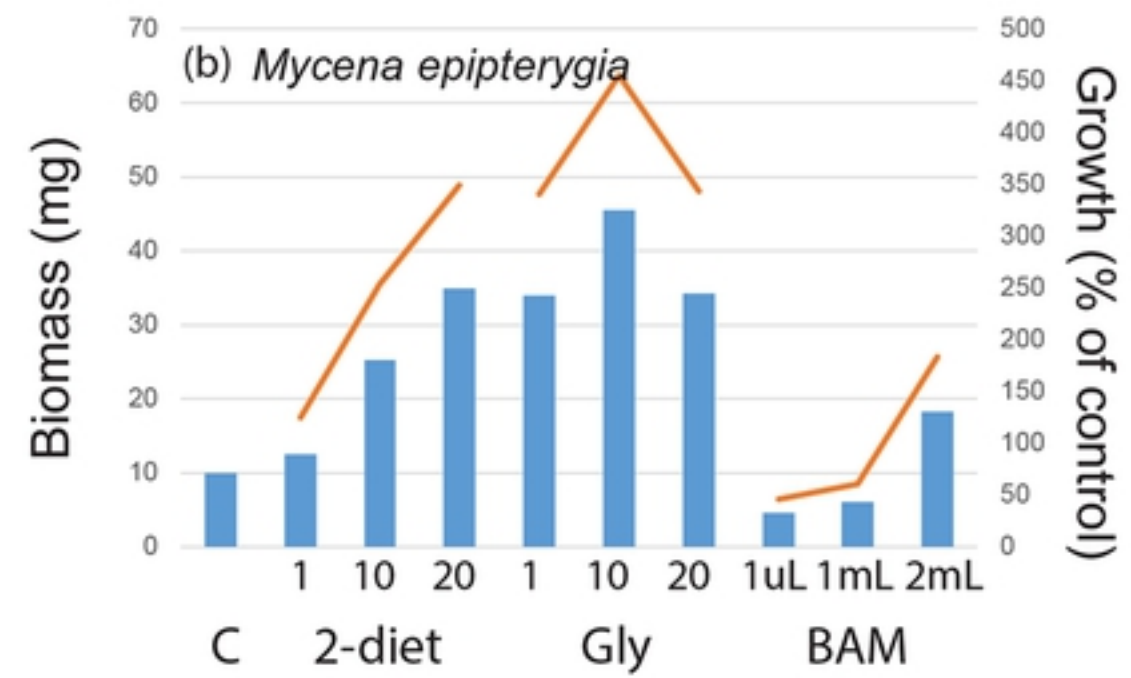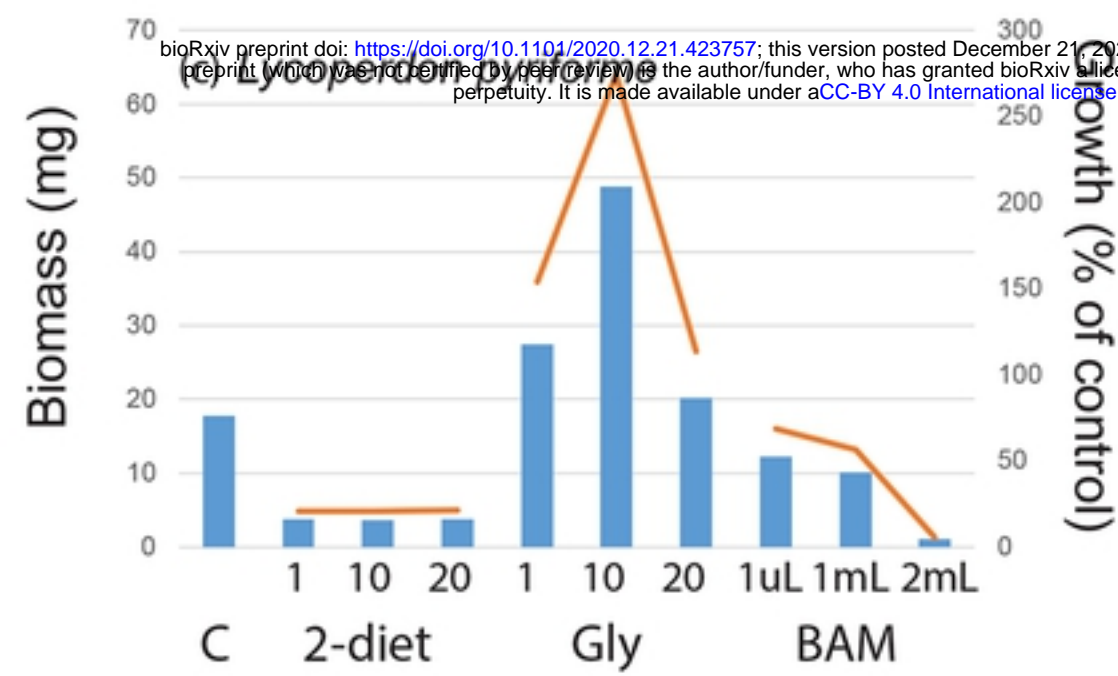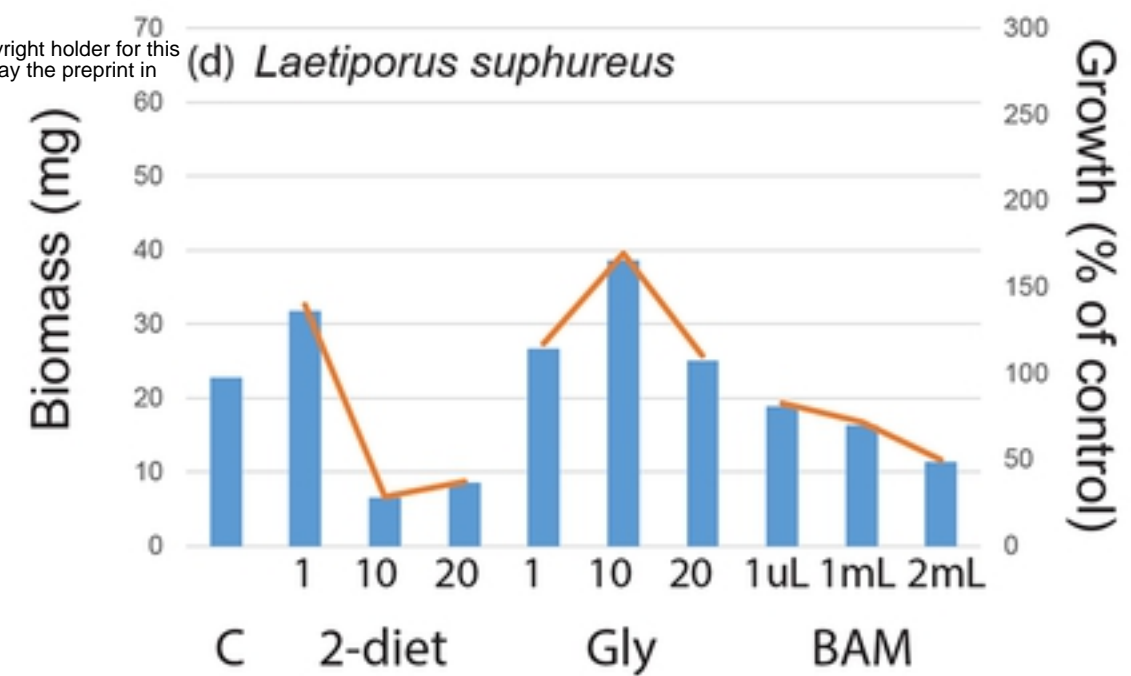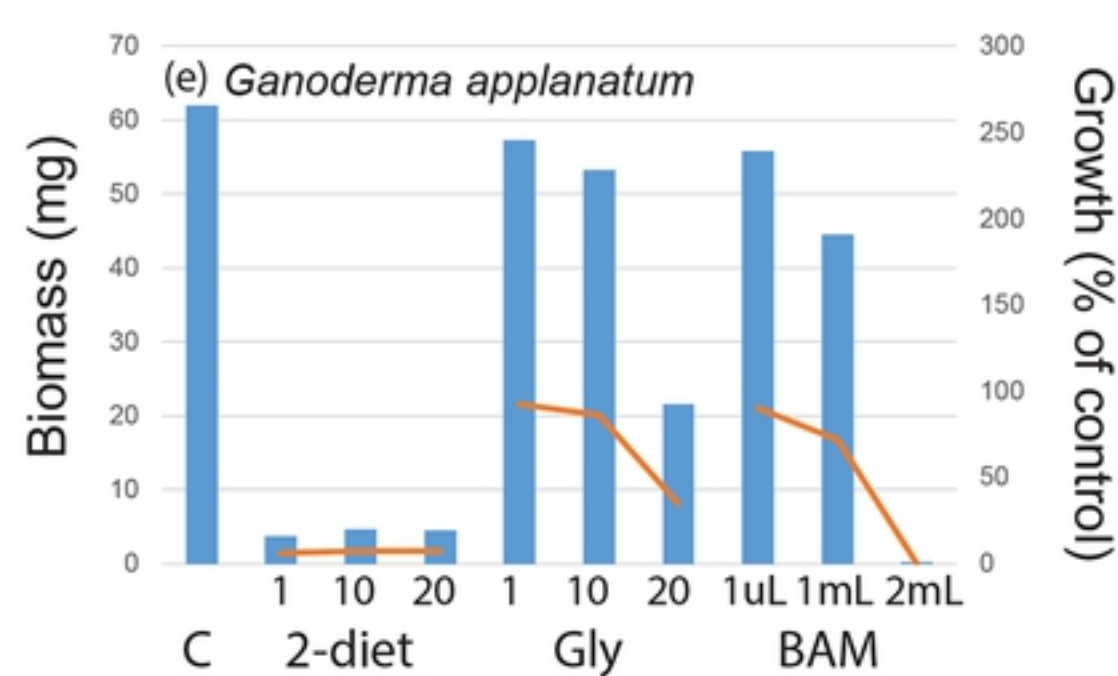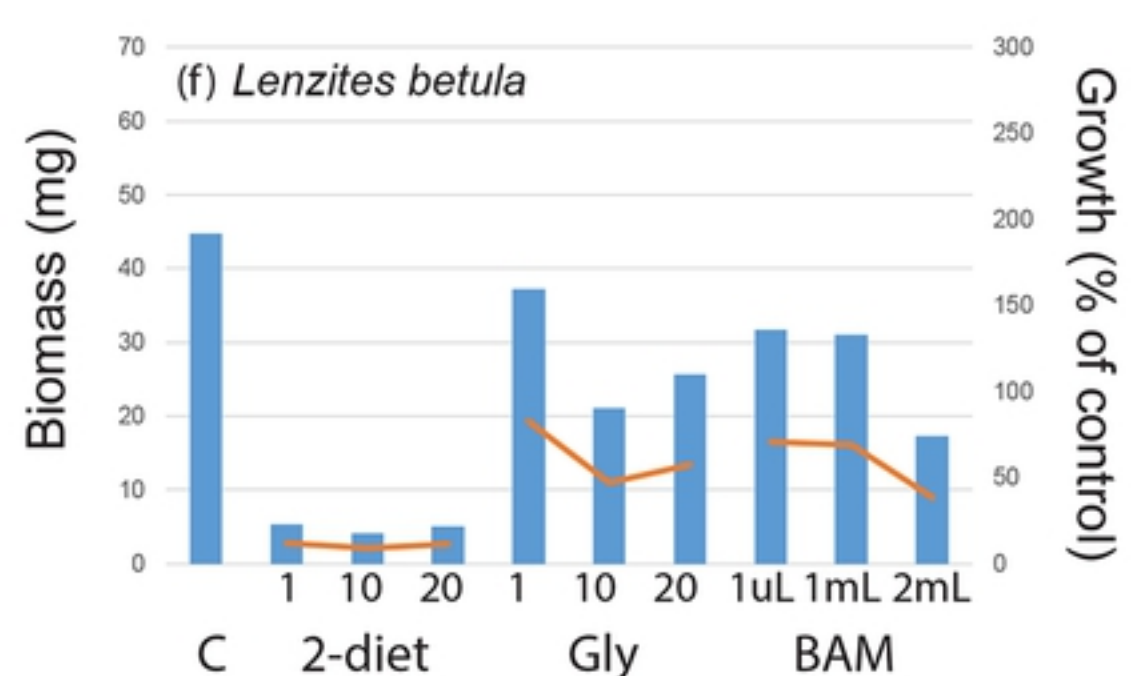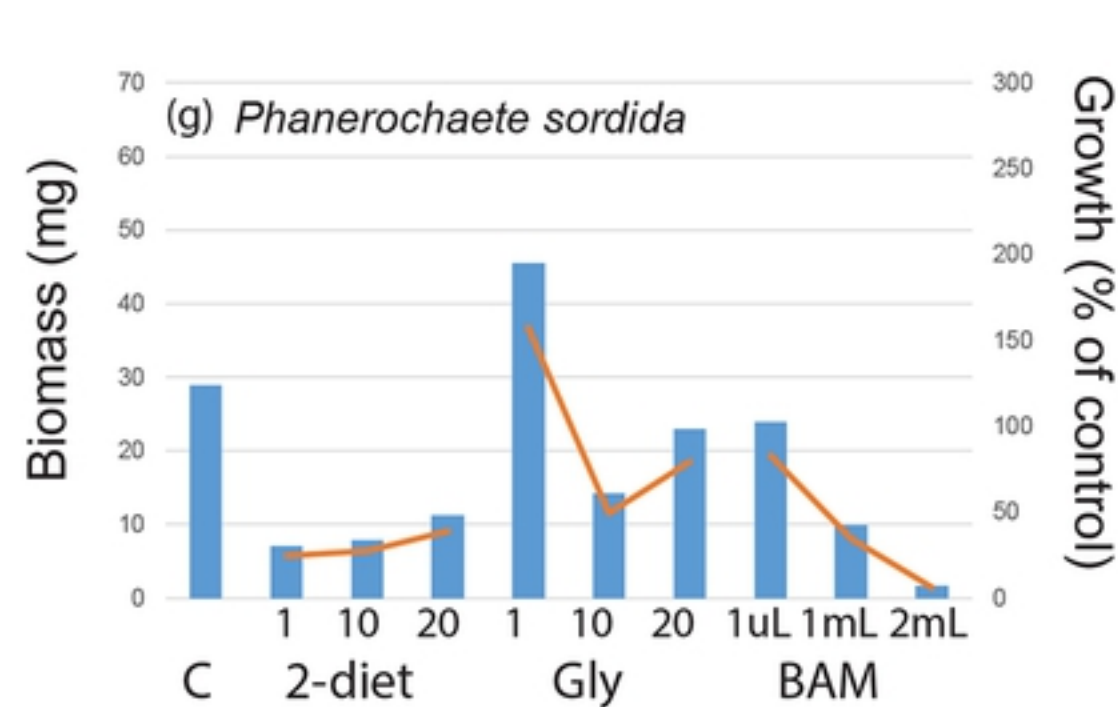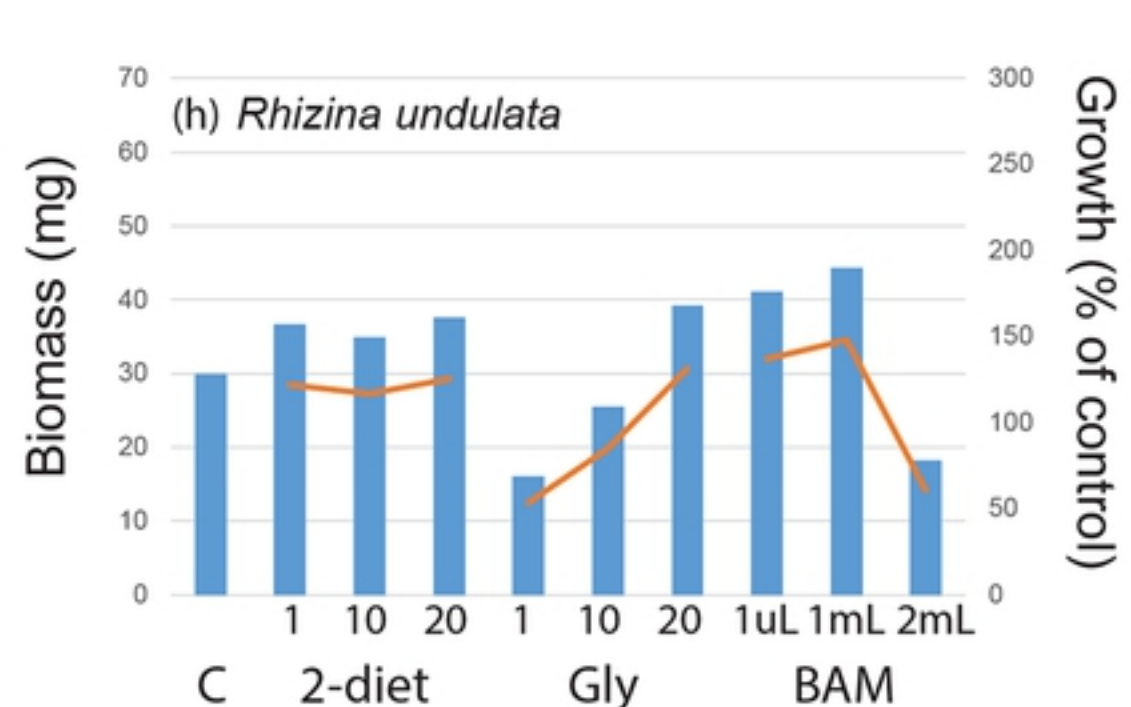

bioRxiv preprint doi: <https://doi.org/10.1101/2020.12.21.423757>; this version posted December 21, 2020. The copyright holder for this preprint (which was not certified by peer review) is the author/funder, who has granted bioRxiv a license to display the preprint in perpetuity. It is made available under aCC-BY 4.0 International license.

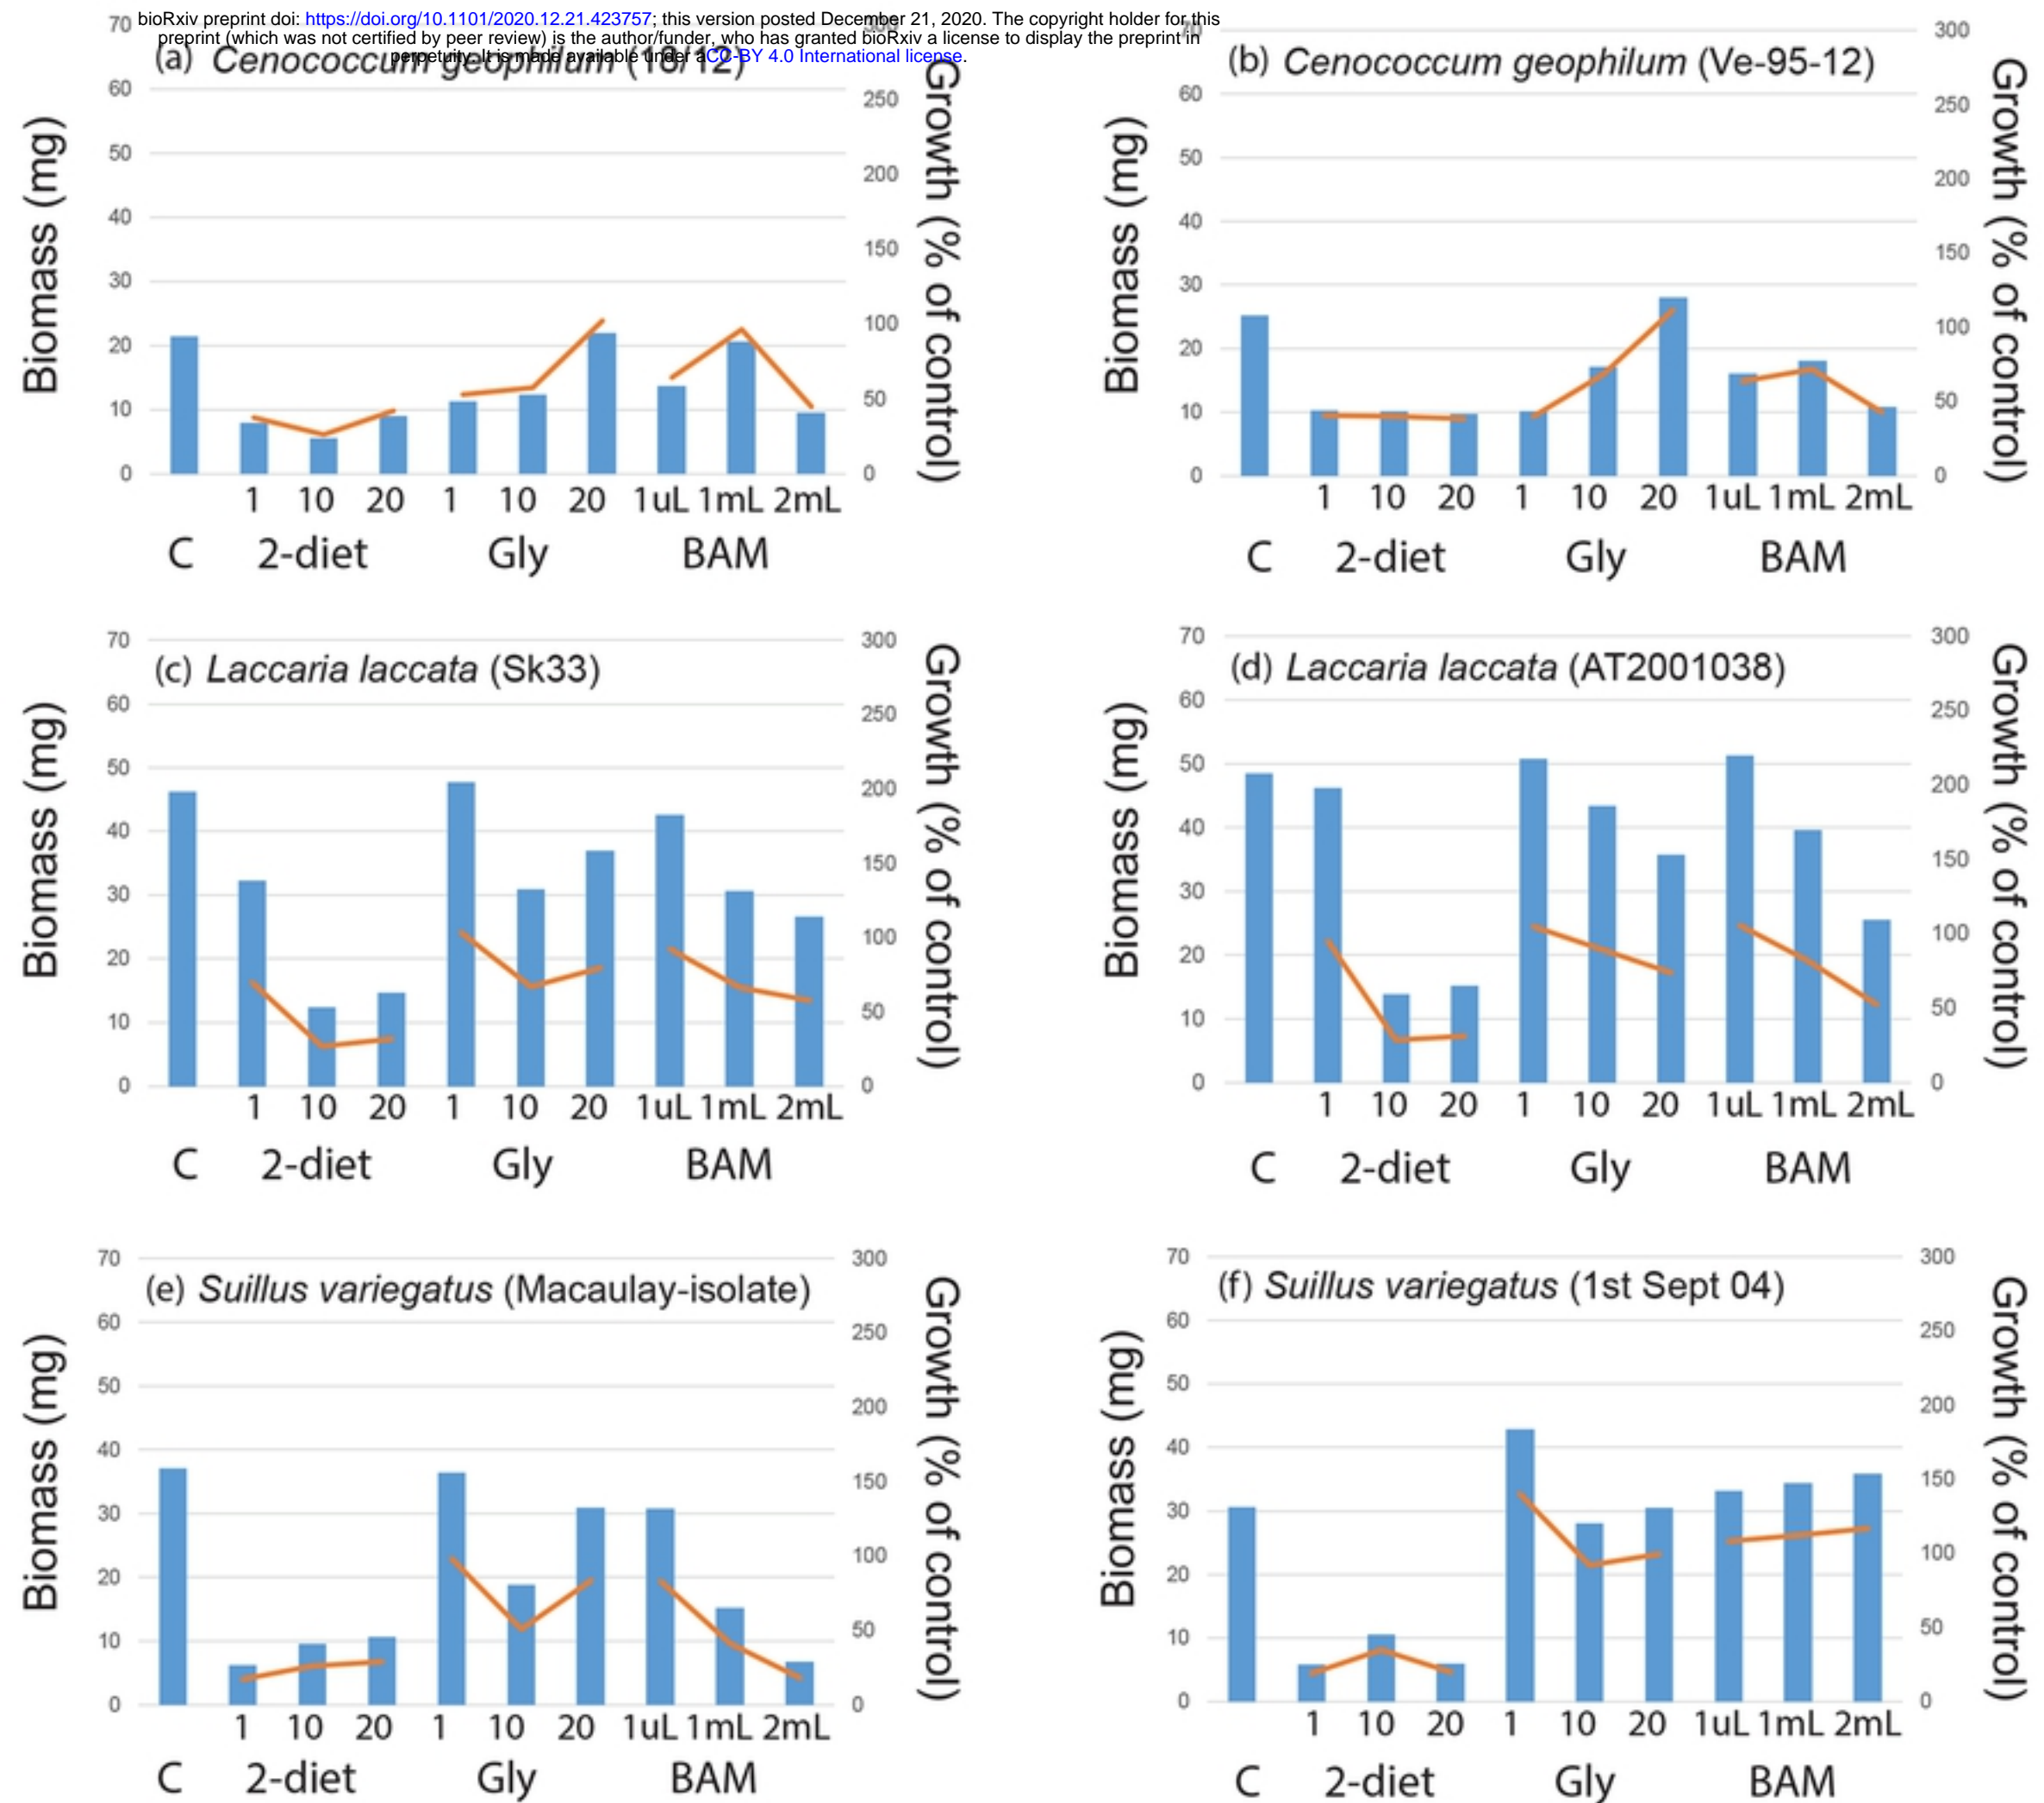

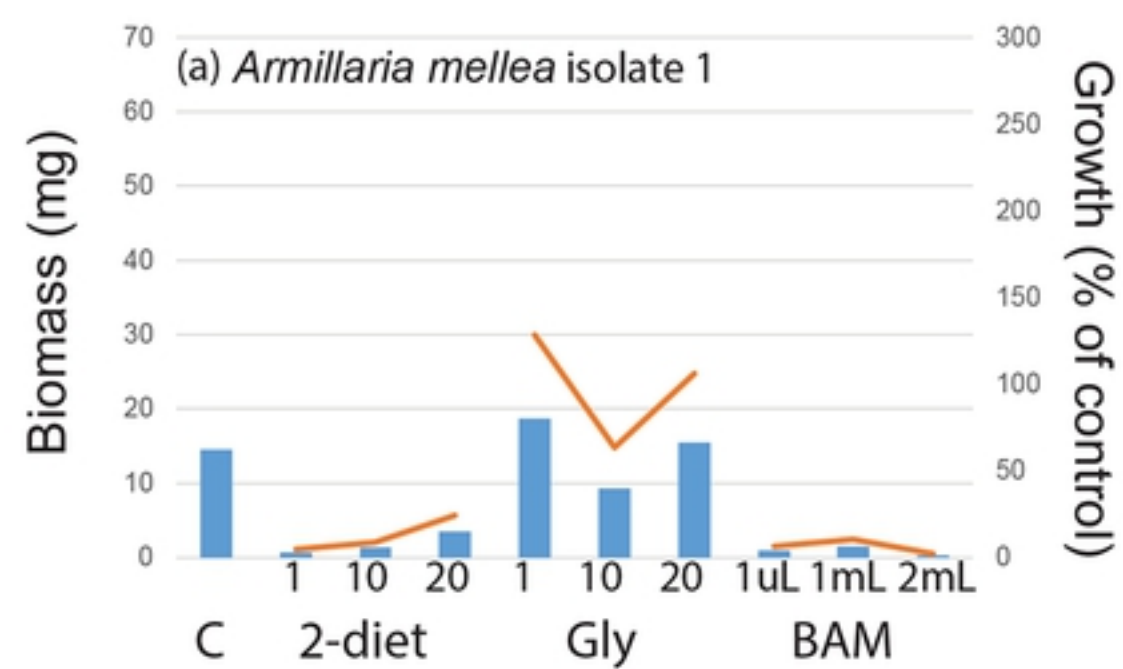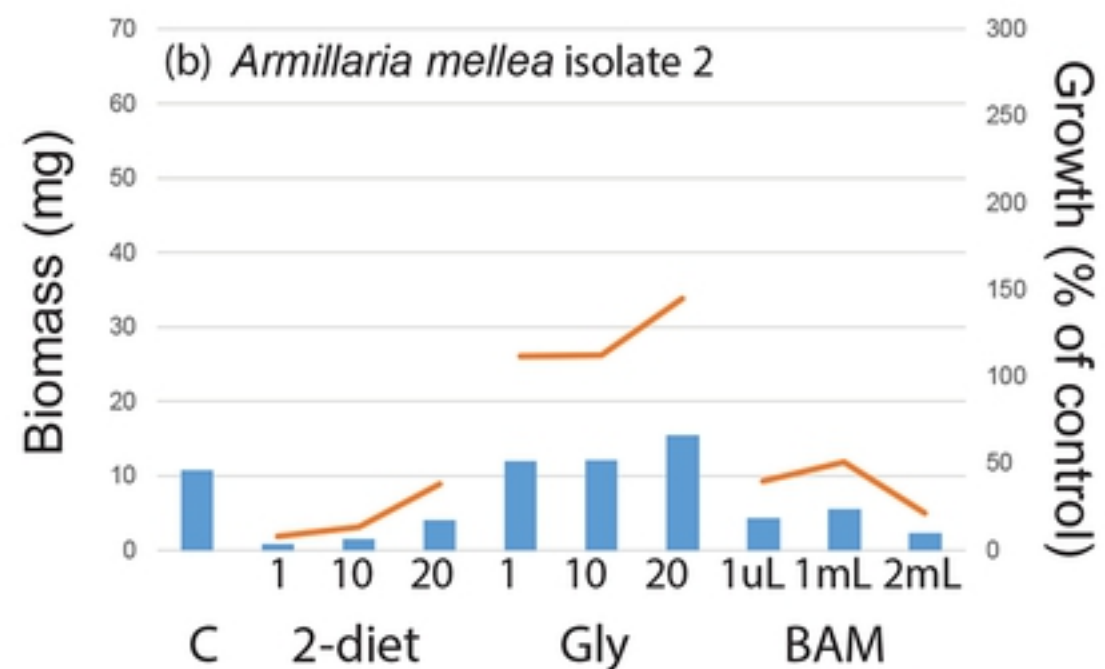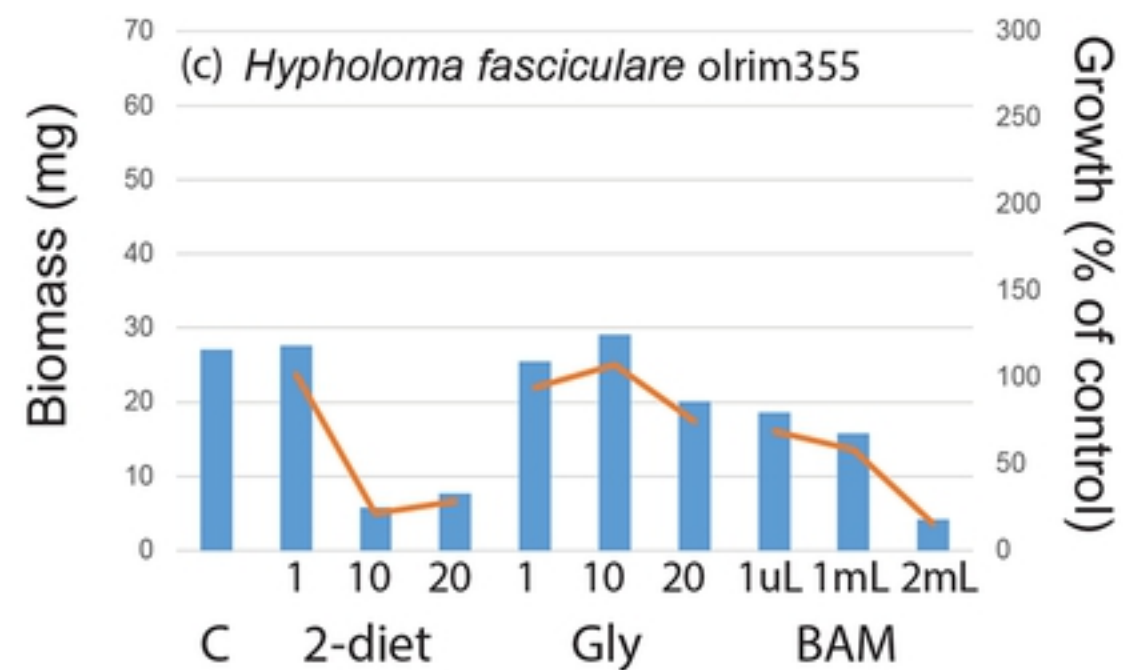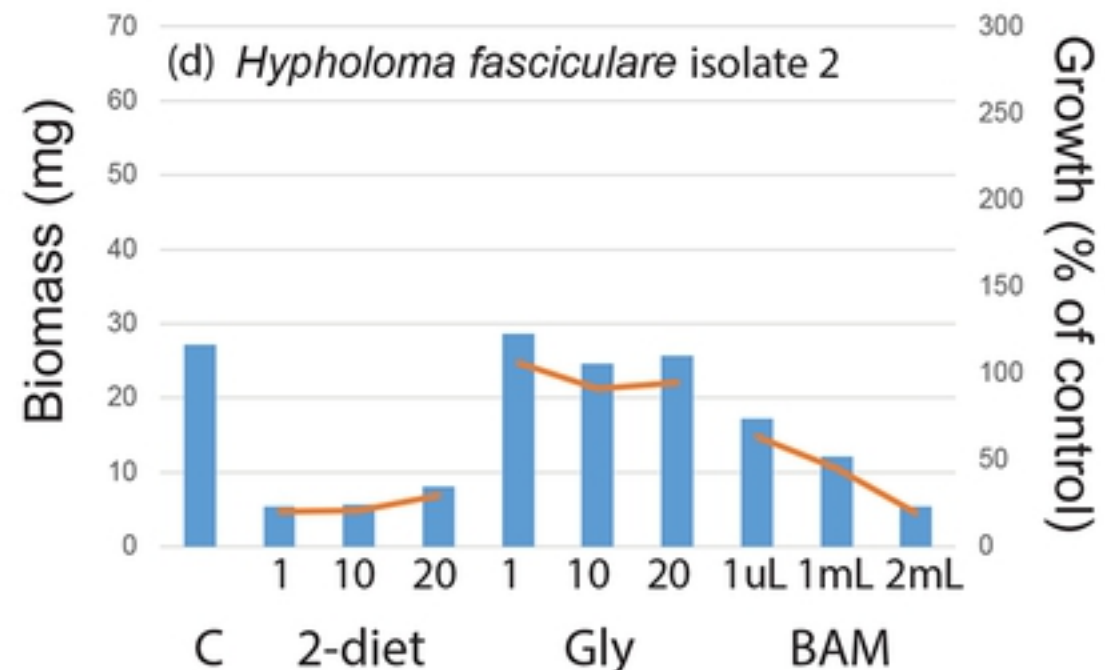



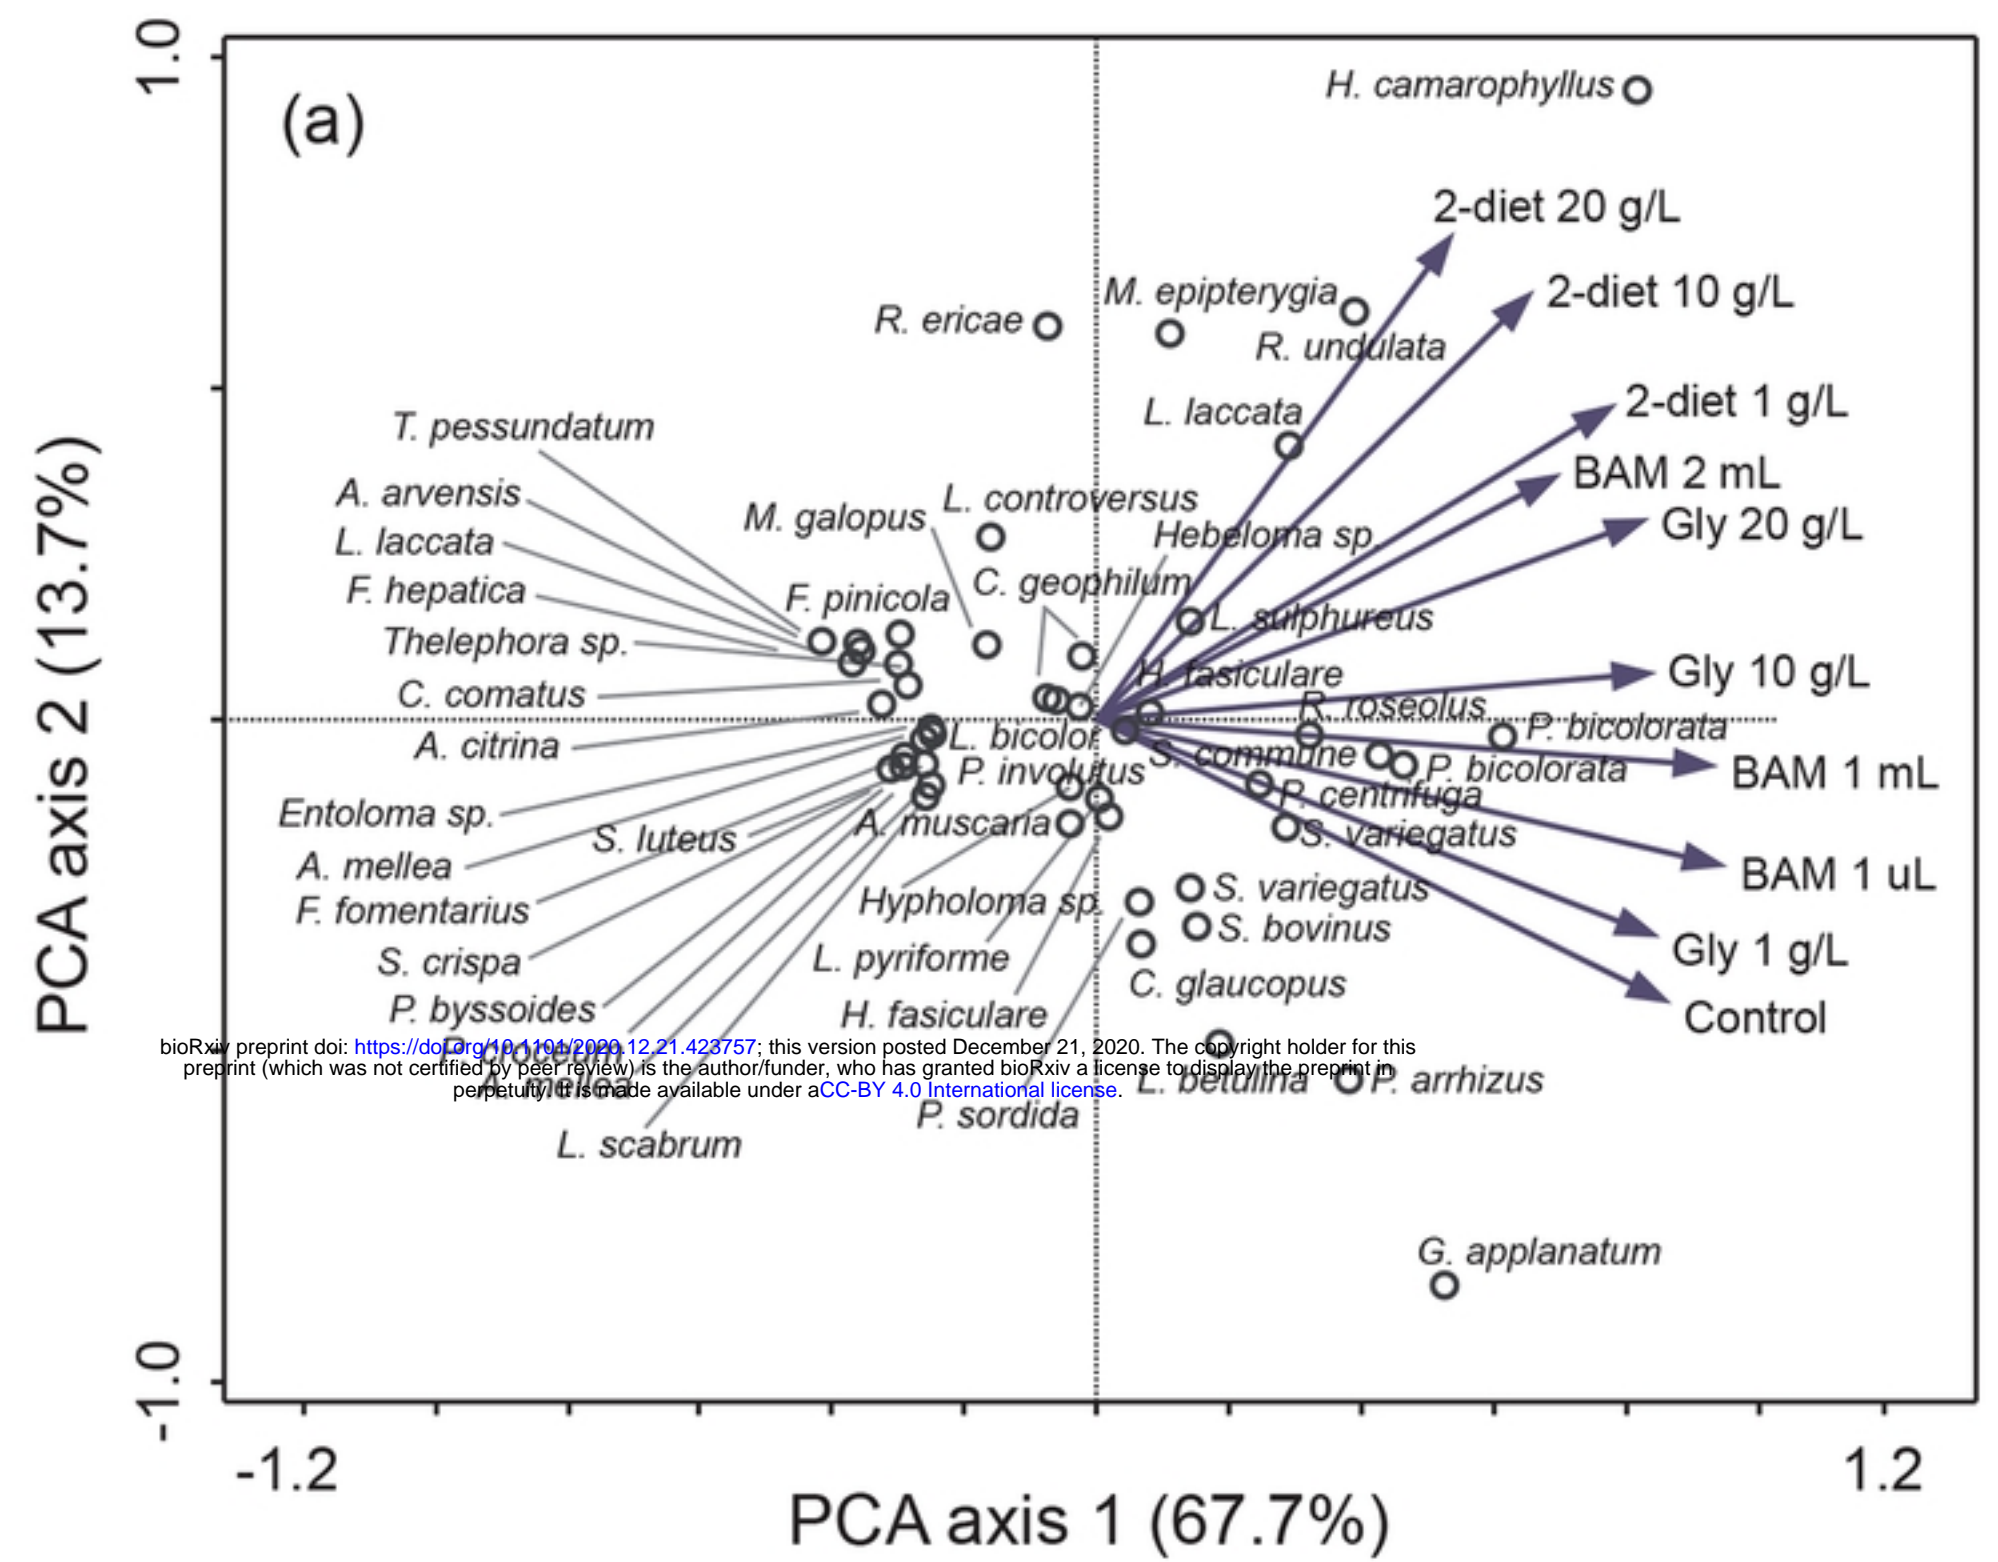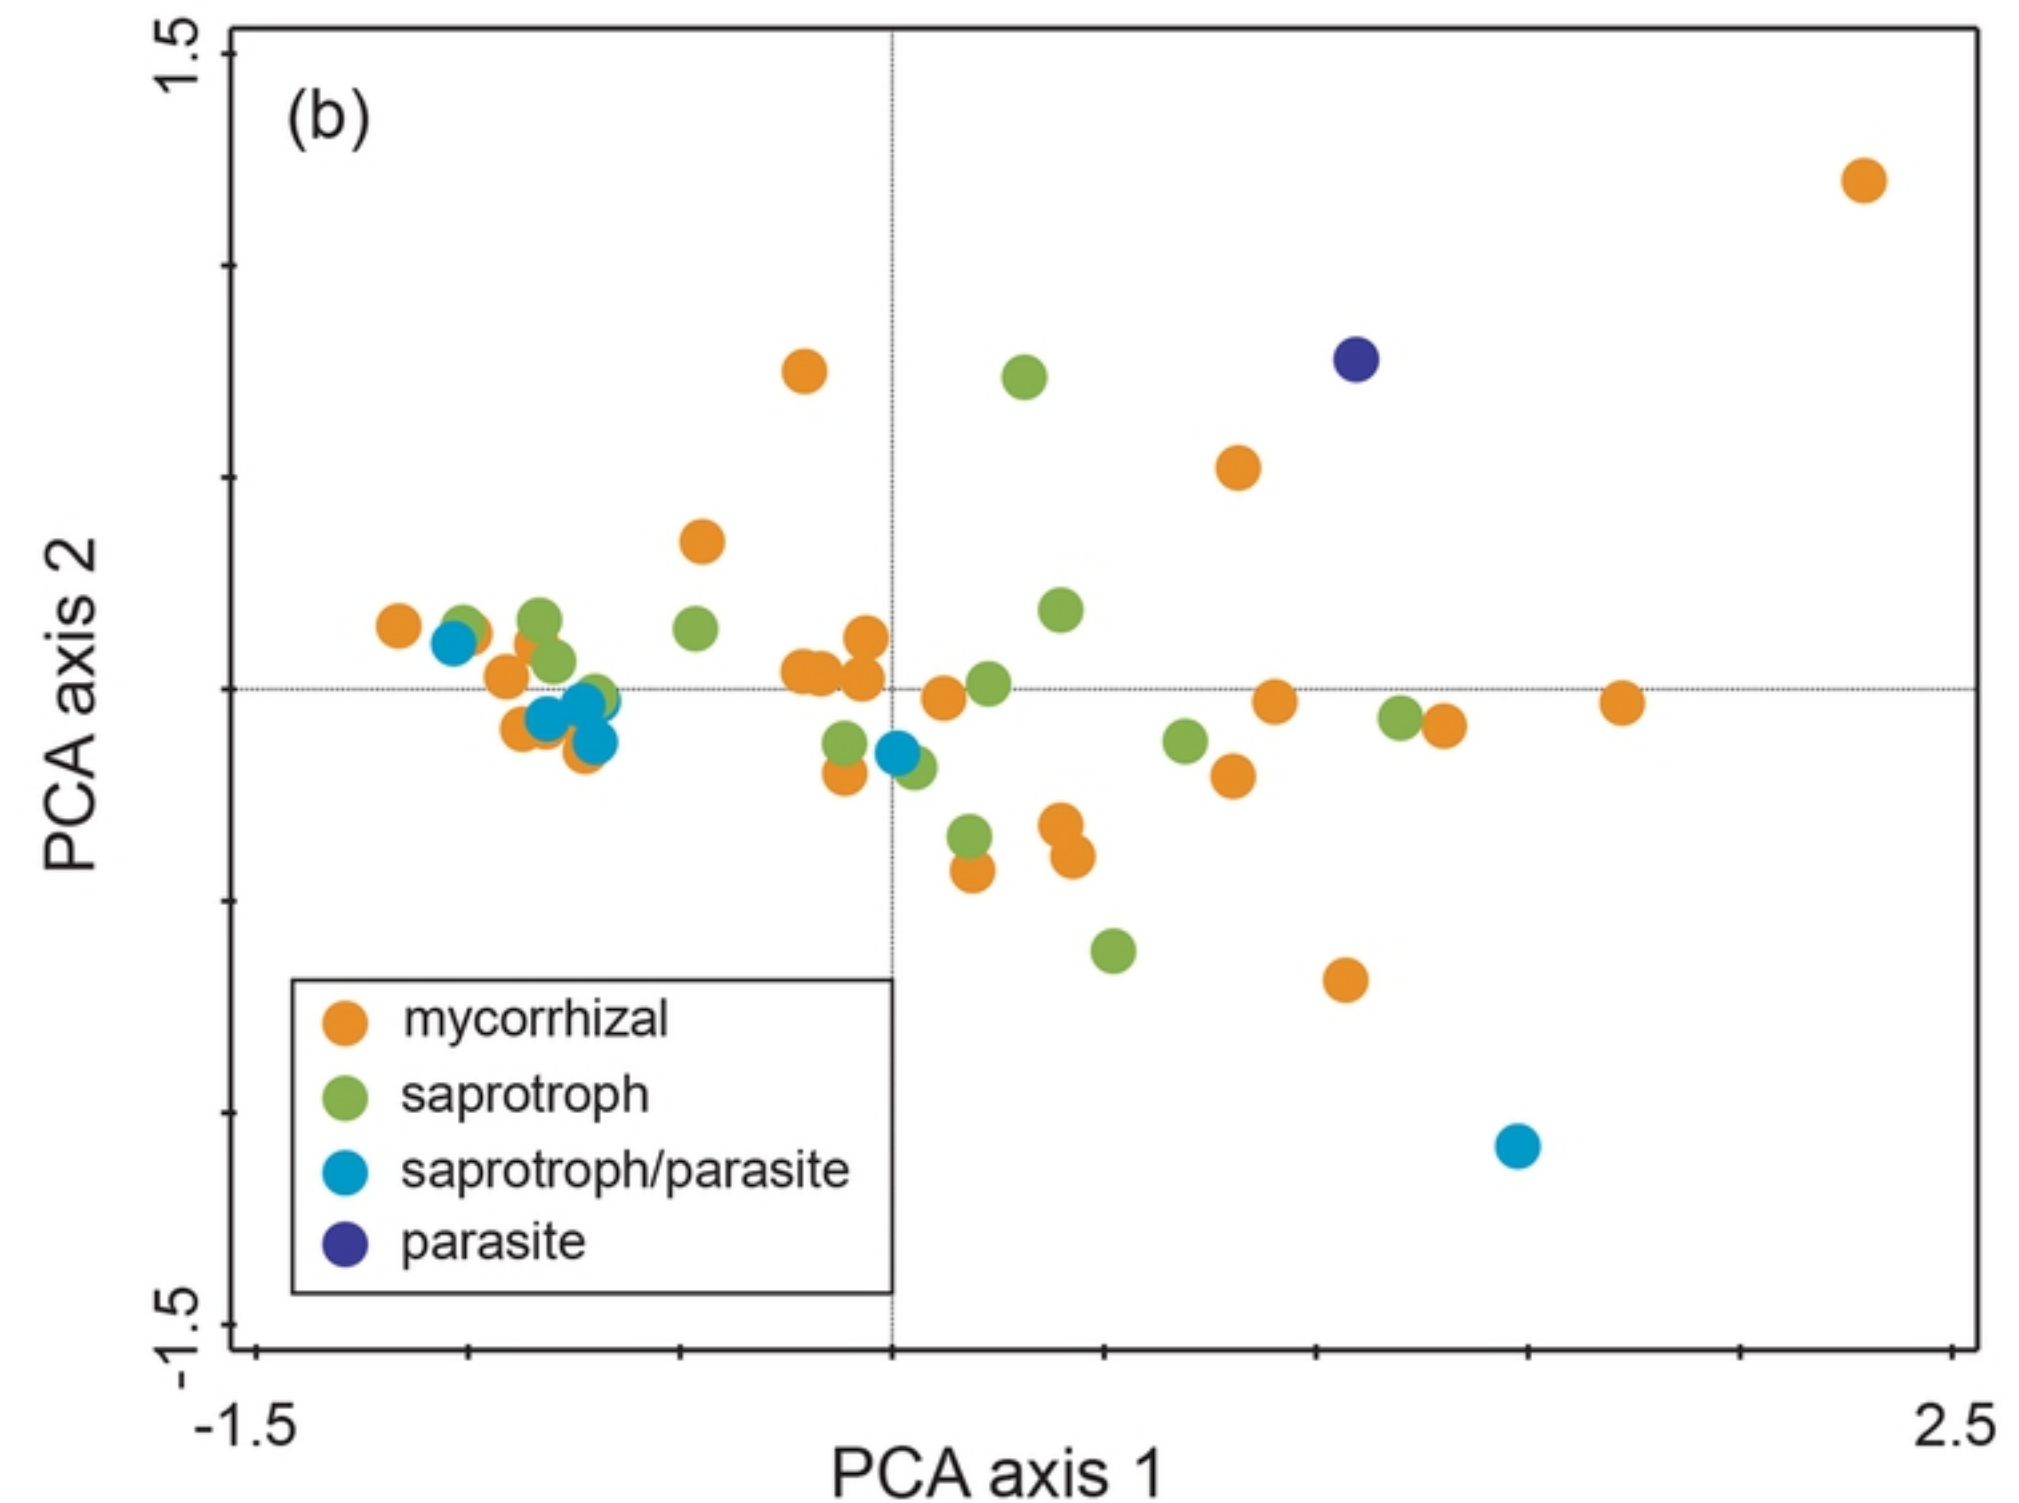



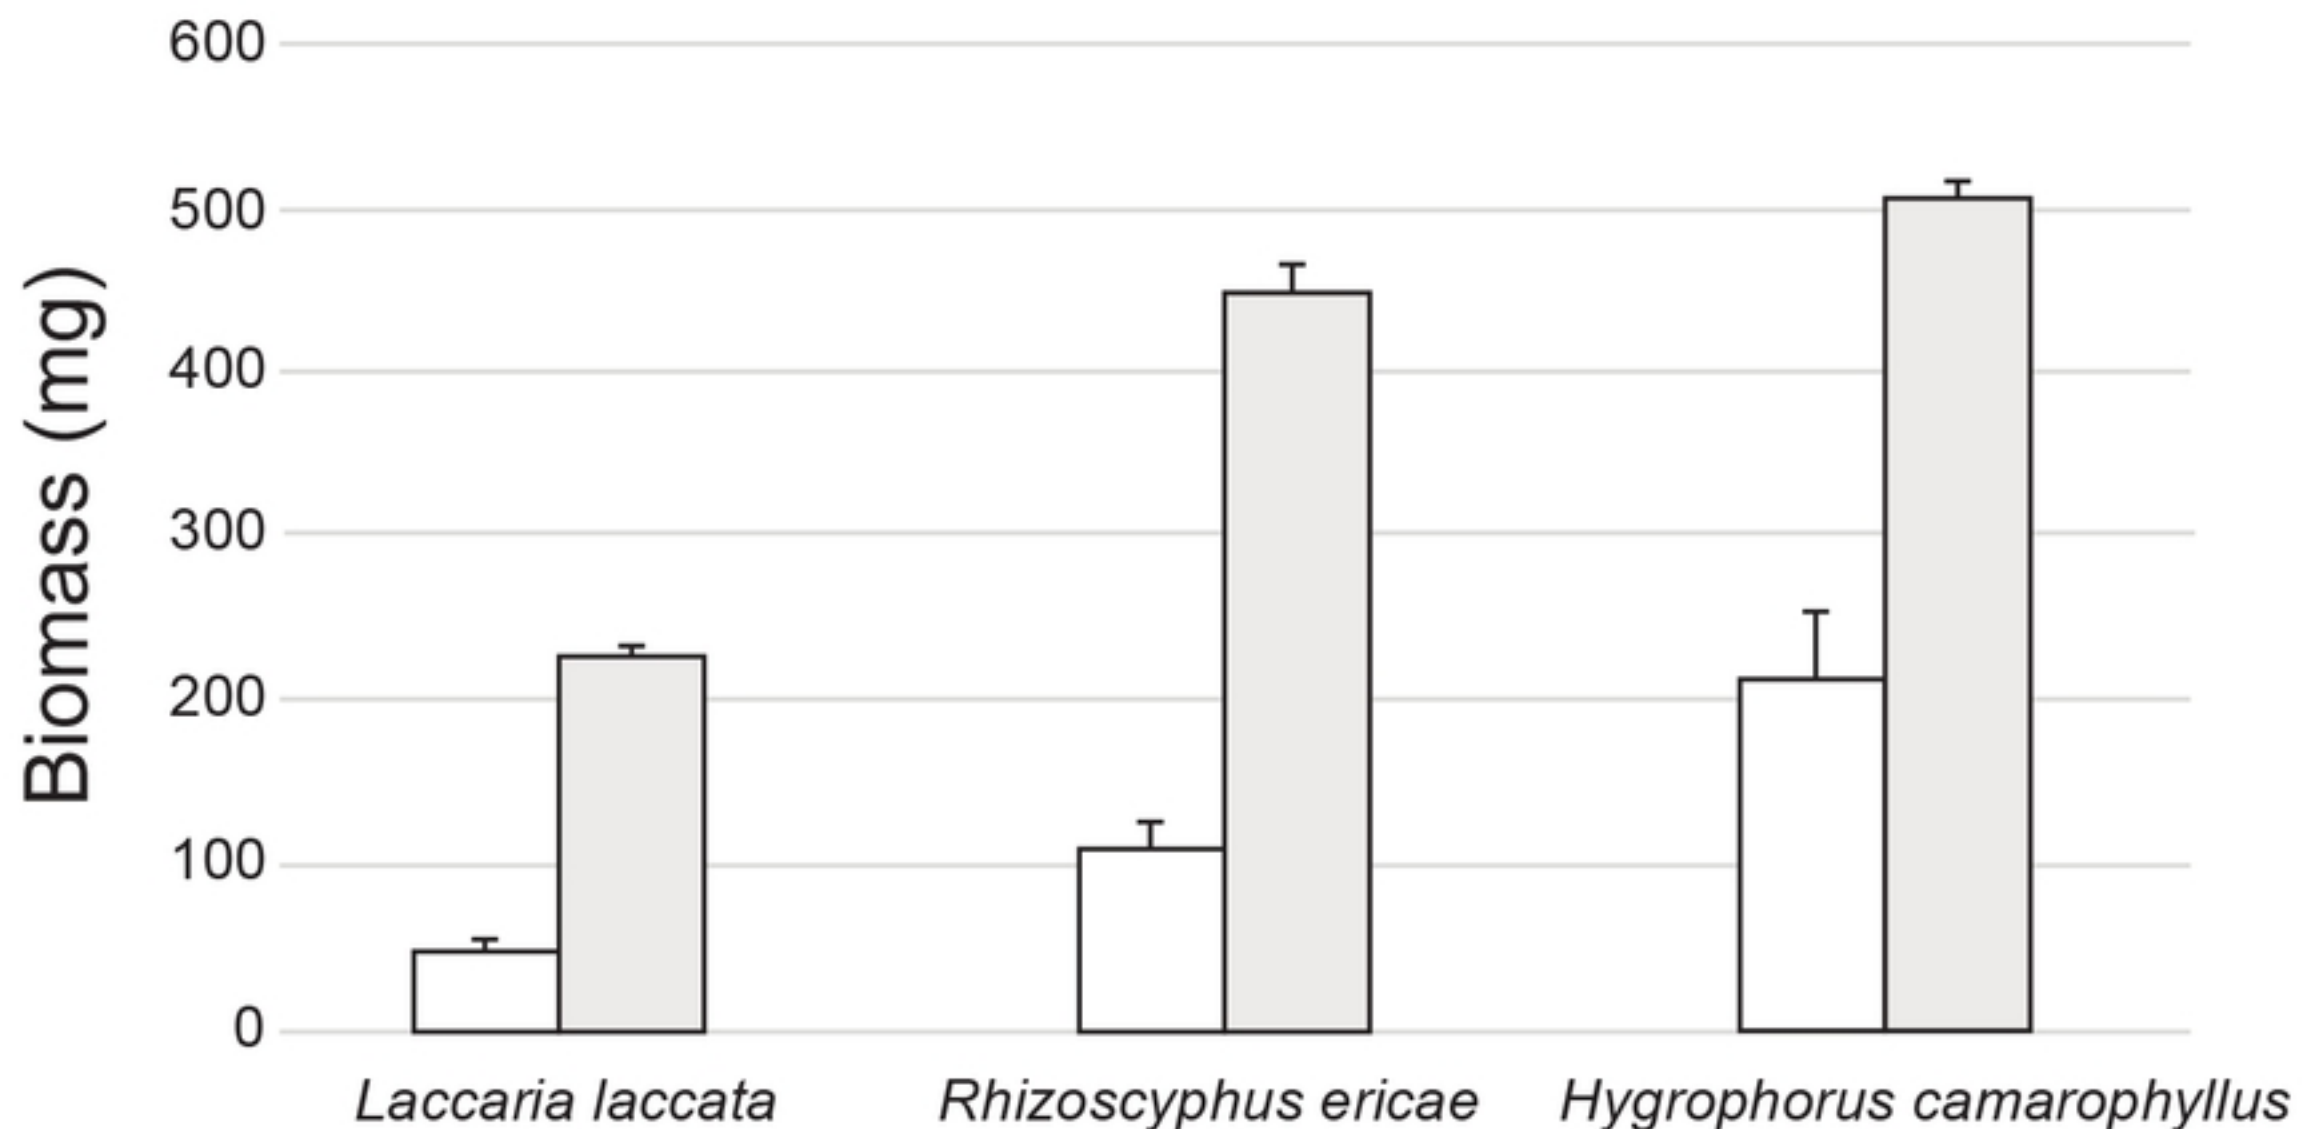

Cover Letter
